# Mechanistic origin of drug interactions between translation-inhibiting antibiotics

Bor Kavčič<sup>1</sup>, Gašper Tkačik<sup>1</sup>, Tobias Bollenbach<sup>2\*</sup>

November 15, 2019

## Summary

Antibiotics that interfere with translation, when combined, interact in diverse and difficult-to-predict ways. Here, we demonstrate that these interactions can be accounted for by “translation bottlenecks”: points in the translation cycle where antibiotics block ribosomal progression. To elucidate the underlying mechanisms of drug interactions between translation inhibitors, we generated translation bottlenecks genetically using inducible control of translation factors that regulate well-defined translation cycle steps. These perturbations accurately mimicked antibiotic action and their interactions, supporting that the interplay of different translation bottlenecks causes these interactions. We further showed that the kinetics of drug uptake and binding together with growth laws allows direct prediction of a large fraction of observed interactions, yet fails for suppression. Simultaneously varying two translation bottlenecks in the same cell revealed how the dense traffic of ribosomes and competition for translation factors results in previously unexplained suppression. This result highlights the importance of “continuous epistasis” in bacterial physiology.

**Keywords:** antibiotics, drug combinations, drug interaction mechanisms, growth laws, bacterial physiology, translation, translation inhibitors, ribosomes, translation factors, ribosome traffic jams

<sup>1</sup>IST Austria, 3400 Klosterneuburg, Austria,

<sup>2</sup>Institute for Biological Physics, University of Cologne, 50937 Cologne, Germany

\*Lead Contact: [t.bollenbach@uni-koeln.de](mailto:t.bollenbach@uni-koeln.de)

## 23 1 Introduction

24 Inhibiting translation is one of the most common antibiotic modes of action, crucial for restraining  
25 pathogenic bacteria [Walsh, 2003]. Antibiotics targeting translation interfere with either the assem-  
26 bly or the processing of the ribosome, or with the proper utilization of charged tRNAs and trans-  
27 lation factors (Fig. 1A,B; Table 1) [Wilson, 2014]. Still, the exact modes of action and physiolog-  
28 ical responses to many such translation inhibitors are less clear, and responses to drug combina-  
29 tions are even harder to understand, even though they offer effective ways of fighting antibiotic re-  
30 sistance [Yeh *et al.*, 2009]. Recently, mechanism-independent mathematical approaches to predict the  
31 responses to multi-drug combinations were proposed [Zimmer *et al.*, 2016; Wood *et al.*, 2012], yet  
32 these approaches rely on prior knowledge of pairwise drug interactions, which are diverse and have  
33 notoriously resisted prediction. They include synergism (inhibition is stronger than predicted), antag-  
34 onism (inhibition is weaker), and suppression (one of the drugs loses potency) [Bollenbach, 2015;  
35 Mitosch and Bollenbach, 2014] (Fig. 1C). To design optimized treatments, the ability to predict or alter  
36 drug interactions is crucial – a challenge that would be facilitated by understanding their underlying  
37 mechanisms [Chevereau and Bollenbach, 2015].

38 Apart from their clinical relevance, antibiotic combinations provide powerful, quantitative and con-  
39 trolled means of studying perturbations of cell physiology [Falconer *et al.*, 2011] – conceptually similar  
40 to studies of epistasis between double gene knockouts [Yeh *et al.*, 2006; Segre *et al.*, 2005]. Trans-  
41 lation inhibitors are particularly suited for this purpose since translation is a fundamental, yet complex  
42 multi-step process that still lacks a comprehensive quantitative description. Part of any such descrip-  
43 tion are “growth laws,” which quantitatively capture the compensatory upregulation of the translational  
44 machinery in response to perturbations of translation [Scott *et al.*, 2010]. Growth laws have enabled  
45 a model that elegantly explains the growth-dependent bacterial susceptibility to individual translation  
46 inhibitors [Greulich *et al.*, 2015]. Finally, well defined translation steps cannot only be perturbed chemi-  
47 cally [Blanchard *et al.*, 2010; Wilson, 2014], but also genetically, as these steps are regulated by trans-  
48 lation factors – specialized proteins that mediate the stability of ribosomal subunits, catalyze assembly  
49 of 70S ribosome and initiation, deliver charged tRNAs to the ribosome, release finished peptides, and  
50 mediate ribosome recycling (Fig. 1A). Both genetic and chemical perturbations obstruct the progression  
51 of ribosomes along the translation cycle, which generally results in a lower growth rate. Comparing the  
52 effects of antibiotics to those of precisely defined genetic perturbations offers an opportunity to elucidate  
53 the mechanisms responsible for drug interactions between translation inhibitors.

54 As drug interactions are largely determined by the modes of action of the combined antibiotics [Yeh  
55 *et al.*, 2006], we hypothesized that a key determinant of interactions between pairs of translation in-  
56 hibitors are the specific steps in the translation cycle where the two inhibitors halt ribosomal progres-  
57 sion (Fig. 1A). As a second key determinant of these drug interactions, we considered the compensatory  
58 physiological response to translation inhibition captured quantitatively by ribosomal growth laws [Scott  
59 *et al.*, 2010] together with the kinetics of antibiotic transport and ribosome binding. We show that these  
60 determinants suffice to understand how most drug interactions between translation inhibitors emerge

61 and that they can be predicted solely from known responses to the individual drugs. To establish this  
 62 result, we used a combination of precise growth measurements, quantitative genetic perturbations of  
 63 the translation machinery, and theoretical modeling.

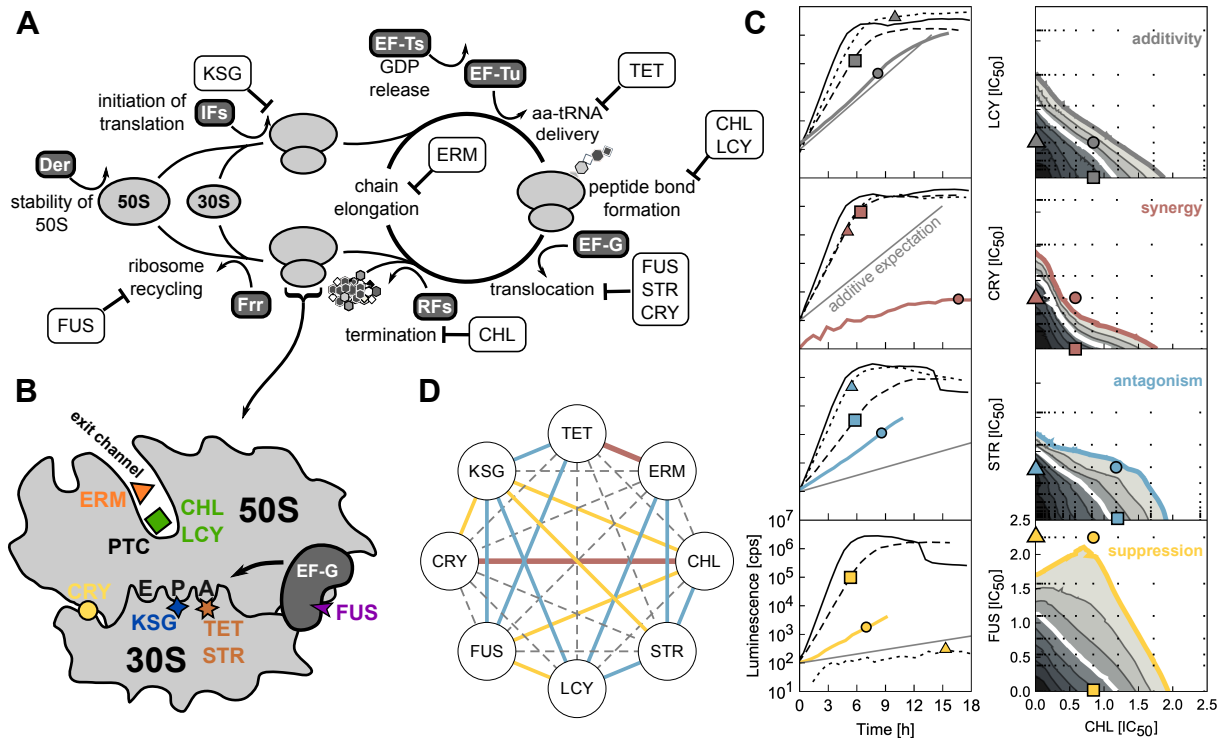

**Figure 1: Antibiotics targeting different translation steps show diverse drug interactions. (A,B)** Schematic of the translation cycle and translation inhibitors. Translation factors are shown in dark gray boxes. Stability of the large subunit is mediated by Der and initiation by initiation factors (IFs). Elongation factors Tu and G (EF-Tu, EF-G) catalyze ribosome progression. Release of GDP from EF-Tu is facilitated by EF-Ts. Release factors (RFs) facilitate the ejection of the finished peptide from the ribosome, whose recycling is mediated by the factor for ribosome recycling (Frr). Translation inhibitors are shown in white boxes (abbreviations in Table 1). **(C)** Examples of growth curves obtained by luminescence assay (left column) in the presence of different antibiotics and their combinations and response surfaces corresponding to different interaction types (right column) (Methods). Symbols on the growth curves indicate the condition used: no symbol, triangle, square and a circle correspond to no drug, CHL-only, second drug only (see vertical axis), and the combination of both, respectively. The growth curves were shifted in time so as to originate from the same point at time 0. Drug interactions are determined based on the shape of lines of equal growth (isoboles). If the addition of the second drug has the same effect as increasing the concentration of the first, the isoboles are straight lines [Loewe and Muischnek, 1926]. Deviations from this additive expectation reveal synergism (the combined effect is stronger and isoboles curve towards the origin), antagonism (the effect is weaker and isoboles curve away from the origin), or suppression (at least one of the drugs loses potency due to the other). **(D)** The drug-interaction network of translation inhibitors. Color-code is as in (C); dashed gray lines denote additivity.

## 2 Results

### 2.1 Pairwise interactions between translation inhibitors are highly diverse

To systematically map the network of drug interactions between translation inhibitors, we selected eight representative antibiotics that interfere with different stages of translation and bind to different sites on the ribosome (Fig. 1A,B; Table 1). To this end, we determined high-resolution dose-response surfaces for all pairwise combinations of these antibiotics (Fig. 1C), by measuring growth rates in two-dimensional drug concentration matrices using a highly precise technique based on bioluminescence [Kishony and Leibler, 2003; Yeh *et al.*, 2006; Chait *et al.*, 2007] (Methods). To quantify the drug interaction, we defined the Loewe interaction score  $LI$  that integrates deviations from Loewe additivity (Fig. 1C, Methods). In this way, we characterized all twenty-eight pairwise interactions and constructed the interaction network between the translation inhibitors (Fig. 1D).

The translation inhibitor interaction network (Fig. 1D) that we measured has several notable properties. First, antibiotics with similar mode of action tend to exhibit additive drug interactions: in particular, there are purely additive interactions between capreomycin (CRY), fusidic acid (FUS), and streptomycin (STR) (which all inhibit translocation) and chloramphenicol (CHL) and lincomycin (LCY) (which both inhibit peptide bond formation), respectively. This observation is consistent with the view that drugs with similar mode of action can substitute for one another. Second, kasugamycin (KSG) is a prominent hub in the network: it shows almost exclusively antagonistic and suppressive interactions with other trans-

| Antibiotic      | Abbreviation | IC <sub>50</sub> [ $\mu$ g/mL] | Mode of action, notes                                                                                                                                                                                                           |
|-----------------|--------------|--------------------------------|---------------------------------------------------------------------------------------------------------------------------------------------------------------------------------------------------------------------------------|
| Chloramphenicol | CHL          | 1.55 $\pm$ 0.01                | Binds in the vicinity of the peptidyl-transferase centre (PTC) on the 50S subunit; partially overlaps with the acceptor stem of tRNA on the A-site [Wilson, 2014].                                                              |
| Lincomycin      | LCY          | 281 $\pm$ 3                    | Lincosamide antibiotic; binds next to PTC and interferes with peptide bond formation [Wilson, 2014].                                                                                                                            |
| Erythromycin    | ERM          | 25.3 $\pm$ 0.2                 | Macrolide antibiotic that binds further down the nascent peptide exit channel (Fig. 1B), and physically blocks the egress of the newly synthesized peptide chain [Wilson, 2014].                                                |
| Kasugamycin     | KSG          | 127 $\pm$ 1                    | Aminoglycoside; interferes with translation initiation by destabilization of the initiator tRNA on the P-site [Schluenzen <i>et al.</i> , 2006].                                                                                |
| Streptomycin    | STR          | 2.55 $\pm$ 0.01                | Aminoglycoside; interferes with the tRNA binding on the A-site as it stabilizes the non-cognate tRNAs and consequently inhibits translocation. It additionally induces mistranslation [Blanchard <i>et al.</i> , 2010].         |
| Tetracycline    | TET          | 0.321 $\pm$ 0.001              | Interferes with the binding of aminoacyl-tRNA to the A-site [Tritton, 1977].                                                                                                                                                    |
| Capreomycin     | CRY          | 23.6 $\pm$ 0.1                 | Inhibits translocation by binding to the interface between subunits and stabilization of the ribosome in the pretranslocation state of the ribosome. It only binds the fully assembled ribosome [Stanley <i>et al.</i> , 2010]. |
| Fusidic acid    | FUS          | 64.5 $\pm$ 0.2                 | Inhibits translocation by over-stabilization of elongation factor G (EF-G) binding to the ribosome and also lowers the rate of ribosome recycling [Savelsbergh <i>et al.</i> , 2009].                                           |

**Table 1: Translation-targeting antibiotics used in this study and their characteristics.**

82 lation inhibitors. Third, we identified a previously unreported synergy between CRY and CHL. Some of  
83 the observed general trends in the drug interaction network, in particular the prevalence of antagonism,  
84 may be explained by a general physiological response to translation inhibition.

85 A number of the interactions we measured confirm previous reports. For example, synergy between  
86 erythromycin (ERM) and tetracycline (TET) was observed before [Yeh *et al.*, 2006; Russ and Kishony,  
87 2018]. Additivity between CHL and TET was also reported; moreover, this interaction proved to be  
88 highly robust to genetic perturbations [Chevereau and Bollenbach, 2015]. Globally, antagonism and  
89 suppression are more common in the translation inhibitor interaction network than synergy, consistent  
90 with a general prevalence of antagonistic interactions between antibiotics [Brochado *et al.*, 2018].

## 91 **2.2 Growth-law based biophysical model correctly predicts some interactions** 92 **but fails to predict suppression**

93 As a first step toward understanding the origin of the observed drug interactions, we developed a math-  
94 ematical model that predicts such interactions from the effects of the individual drugs alone. We gen-  
95 eralized a biophysical model for the effect of a single antibiotic on bacterial growth [Greulich *et al.*,  
96 2015] to the situation where two antibiotics are present simultaneously. The model consists of ordinary  
97 differential equations taking into account passive antibiotic transport into the cell, binding to the ribo-  
98 some (Fig. 2A,B), dilution of all molecular species due to cell growth, and the physiological response of  
99 the cell to the perturbation (Fig. 2C). The latter is described by ribosomal growth laws [Scott *et al.*, 2010;  
100 Greulich *et al.*, 2015], which quantitatively connect the growth rate to the total abundance of ribosomes  
101 when growth rate is varied by the nutrient quality of media or by translation inhibitors. All parameters of  
102 the model can be inferred from the dose-response curves of individual drugs (Fig. 2D).

103 When two different antibiotics are present simultaneously, separate variables are needed to describe  
104 ribosomes that are bound by either of the antibiotics individually or simultaneously by both (Fig. 2A).  
105 In the absence of knowledge about direct molecular interactions on the ribosome (as for the pairs  
106 of lankamycin and lankacidin or of dalfopristin and quinupristin [Harms *et al.*, 2004; Belousoff *et al.*,  
107 2011]), we assumed that the antibiotic binding and unbinding rates are independent of any previously  
108 bound antibiotic (Fig. 2B). The resulting model makes direct predictions for drug interactions between  
109 translation inhibitors using only parameters that are inferred from the individual drug dose-response  
110 curves.

111 Using this model, we calculated the predicted response surfaces for all translation inhibitor pairs  
112 and compared them to the experimentally measured surfaces (Methods, Fig. 2E). Certain drug interac-  
113 tions were correctly predicted by this approach (ERM-KSG, TET-ERM in Fig. 2E-i and ii), indicating that  
114 binding kinetics and growth physiology alone suffice to explain these interactions. Correctly predicted  
115 drug interactions include additive cases which often involve antibiotics that have either the same mode  
116 of action (CRY-FUS, CRY-STR, FUS-STR, CHL-LCY) or partially overlapping binding sites (CHL-LCY,  
117 ERM-CHL) [Wilson, 2014]. For the latter, the assumption that the formation of the doubly-bound ribo-  
118 some population is prohibited, which yields an additive response surface, offers even better agreement

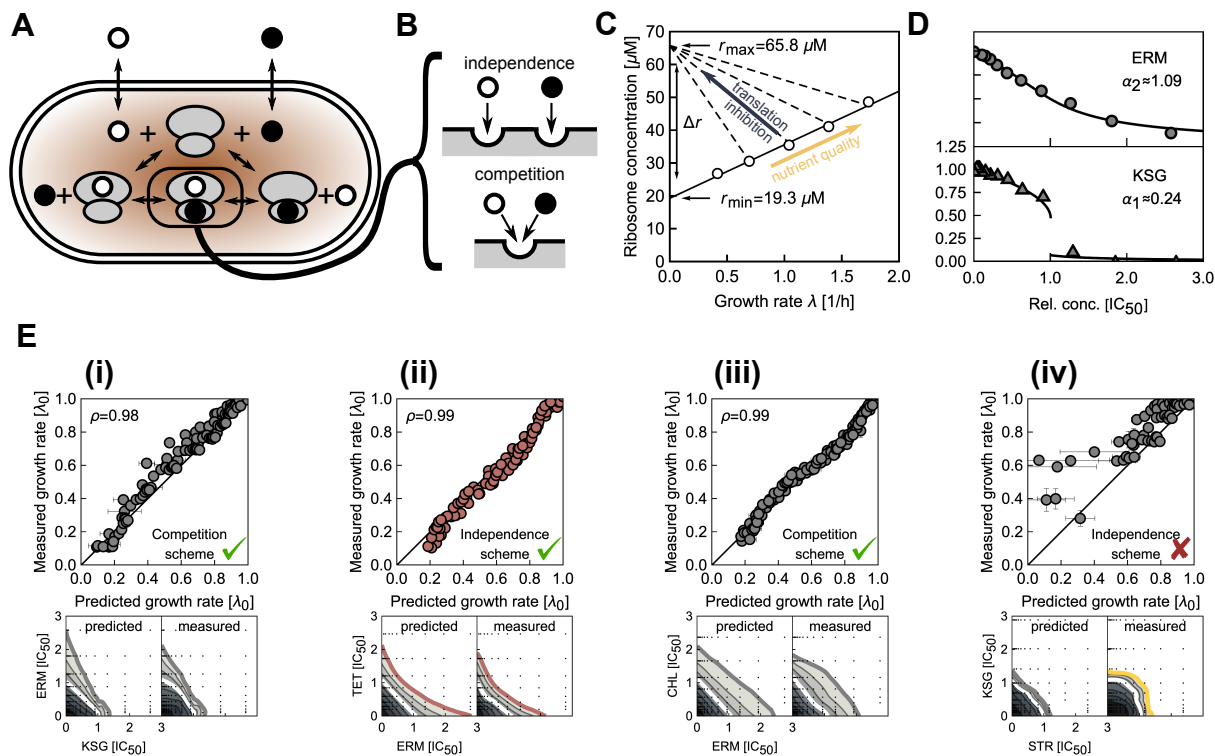

**Figure 2: Mathematical model of combined antibiotic action based on growth laws partially predicts drug interactions.**

(A) Schematic of antibiotic binding and transport into the cell. Antibiotics (circles) bind to the unbound ribosomes (gray) in the first binding step; bound ribosomes can be bound by a second antibiotic. (B) Schematic of antibiotics binding independently (top) or competing for the same binding site (bottom). (C) Growth laws link intracellular ribosome concentration to the growth rate. Solid line: ribosome concentration when growth rate is varied by varying nutrient quality; dashed lines: ribosome concentration when growth rate is lowered by perturbation of translation. Circles show data from Ref. [Greulich *et al.*, 2015]. (D) Data points are dose-response curves for ERM and KSG; lines show best fits of the mathematical model. The best-fit values of the steepness parameter  $\alpha$  that encapsulates kinetic and physiological parameters (Methods) are shown. Both shallow (top panel, ERM) and steep (bottom panel, KSG) dose-response curves are observed. (E) Examples of predicted dose-response surfaces. Scatter plot depicts correlation between predicted and measured growth rate. The binding scheme assumed is indicated on the bottom right and Pearson's  $\rho$  on the top left. Predicted and measured dose-response surfaces are shown below the scatter plot. Color of 20% isobole (bottom) and plot markers (top) denotes the type of predicted interaction. (i) Response surface for antibiotics from (D). Here, the independent binding scheme quantitatively predicts the response surface. (ii) As in (i) but for ERM-TET; model with independent binding scheme correctly predicts mild synergism. (iii) For CHL-ERM, a competitive binding scheme results in an additive interaction, which is observed experimentally. (iv) Interaction between STR-KSG is not explained by the model.

119 with the experimental data (Fig. 2E-iii).

120 Other drug interactions clearly deviated from the model predictions. An example is the suppressive/antagonistic interaction between STR and KSG, which was predicted to be additive (Fig. 2E-iv).  
 121 Such clear deviations could originate from the direct molecular interactions of the drugs on the ribosome, and thus be specific for every pair of drugs. Alternatively, these mechanisms could originate  
 122 from the multi-step structure of the translation cycle itself, making general predictions possible. In the  
 123 most complex cases, drug interactions could result from drug effects that are unrelated to the primary  
 124 drug target [Chevereau and Bollenbach, 2015], in particular from effects on drug uptake or efflux [Lazar  
 125  
 126

127 *et al.*, 2013]. We focused on the most general hypothesis that drug interactions arise from the interplay  
128 of ribosomes halted in different stages of translation cycle such as initiation, translocation, recycling,  
129 etc. (Fig. 1).

### 130 **2.3 Inducible genetic bottlenecks in translation strongly affect antibiotic effi-** 131 **cacy**

132 To test this hypothesis, we developed a technique to determine how halting ribosomes in different  
133 stages of the translation cycle affects the efficacy of various antibiotics. Specifically, we imposed ar-  
134 tificial bottlenecks in translation by genetically limiting the expression of translation factors that catalyze  
135 well-defined translation steps [Cole *et al.*, 1987]. We constructed *E. coli* strains with translation factor  
136 genes under inducible control of a synthetic promoter [Lutz and Bujard, 1997]. These genes were in-  
137 tegrated in the chromosome outside of their endogenous loci and the endogenous copy of the gene  
138 was disrupted (Fig. 3A; Methods). This yielded six strains that enable continuous control of key trans-  
139 lation processes (Fig. 3B): stabilization of the 50S subunit (*der*), initiation (*infB*), delivery of charged  
140 tRNAs (*tufA/B*), release of GDP from elongation factors (*tsf*), translocation (*fusA*) and recycling of the  
141 ribosomes (*frr*) [Rodnina, 2018]. Reducing translation factor expression by varying the inducer con-  
142 centration resulted in a gradual decrease in growth which stopped at almost complete cessation of  
143 growth, reflecting the essentiality of translation factors (Fig. 3C, Methods and SI). Since the endoge-  
144 nous regulation of translation factors generally follows that of the translation machinery [Maaløe, 1979;  
145 Gordon, 1970; Blumenthal *et al.*, 1976; Furano and Wittel, 1975], limiting the expression of a single  
146 translation factor imposes a highly specific bottleneck as all other components get upregulated. Fur-  
147 thermore, any global feedback regulation is left intact as we removed the factor from its native operon.  
148 These synthetic strains thus offer precise control over artificial translation bottlenecks that determine  
149 the rates of different translation steps.

150 We next used these strains to assess the impact of bottlenecks on antibiotic efficacy. Accordingly,  
151 we measured growth rates over a two-dimensional matrix of concentrations of inducer and antibiotic  
152 for each of the six strains (Fig. 3C; Methods). To address if the action of the antibiotic is independent  
153 of the translation bottleneck, we analyzed these experiments using a multiplicative null expectation.  
154 Note that additivity as used for antibiotics (Fig. 1C) is not a suitable null expectation here since the  
155 responses to increasing concentrations of antibiotic and inducer are opposite. However, if antibiotic  
156 action is independent of the translation bottleneck, the growth rate should be a product of the relative  
157 growth rates of each of the two perturbations acting individually. Independence implies that the dose-  
158 response surface is obtained as a multiplication of the antibiotic dose-response and the translation factor  
159 induction curve. Deviations from independence indicate a nontrivial interaction between the bottleneck  
160 and the antibiotic action.

161 We systematically identified interactions between translation inhibitors and bottlenecks by their devi-  
162 ation from independence. In general, antibiotic action can be alleviated or aggravated by a given bottle-  
163 neck, *i.e.*, the bacteria can be less or more sensitive to the antibiotic due to the bottleneck, respectively.

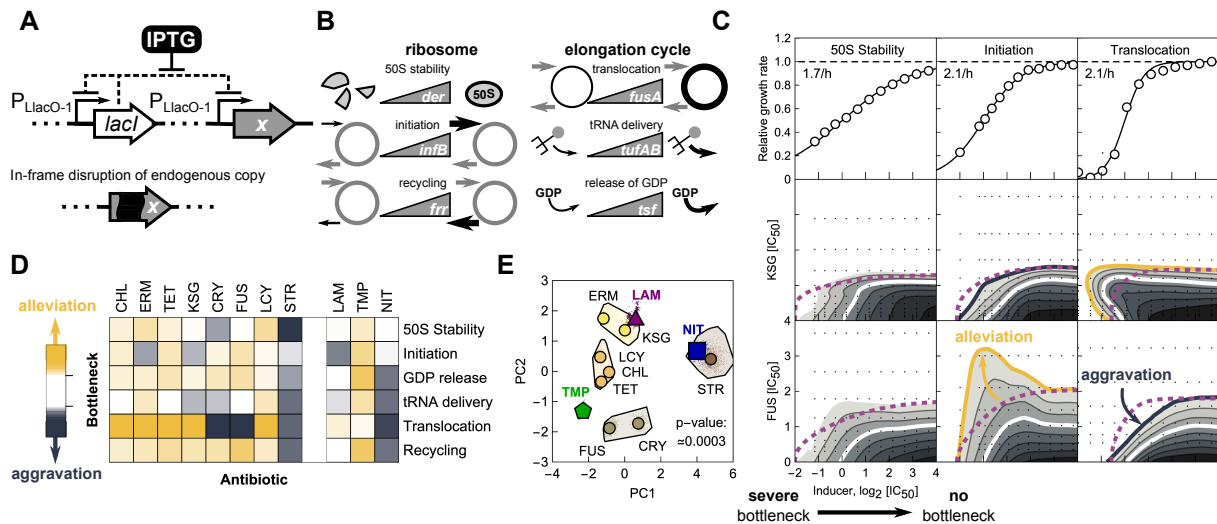

**Figure 3: Artificial translation bottlenecks strongly affect antibiotic efficacy.** (A) Schematic of synthetic regulation introduced to control the expression of a translation factor *x*, which creates an artificial bottleneck in translation at a well-defined stage; *lacI* codes for the Lac repressor, which represses the  $P_{LacO-1}$ -promoter (Methods, [Lutz and Bujard, 1997]). (B) Constructs were made for six translation factors mediating 50S stability (*der*), initiation (*infB*), recycling (*frr*), translocation (*fusA*), tRNA delivery (*tufAB*) and GDP release (*tsf*), respectively. Higher expression alleviates the artificial bottleneck. Thicker lines or arrows indicate higher rates. (C) Translation factor induction curves (upper row) and response surfaces over inducer-antibiotic grid for different antibiotics (KSG and FUS, middle and bottom row, respectively) in combination with different bottlenecks (50S stability, initiation, and translocation). Full induction of the translation factor rescues wild type growth; increasing bottleneck severity leads to smooth decrease in growth rate to zero. Comparison of the response surfaces with independent expectation (dashed purple line) identify alleviation (orange line) or aggravation (blue line). (D) Columns show bottleneck dependency vectors in color code; dependency vectors quantify the response of a given antibiotic to the translation bottlenecks (Methods). (E) Clustering of the bottleneck dependency vectors upon dimensionality-reduction by Principal Component Analysis (PCA; Methods). Circles show dependency vectors projected onto the first two principal components (PC1, PC2); colors indicate cluster identity. The extended cluster areas shown are convex hulls of bootstrapped projections (denoted by dots; Methods). Deviations of the three additional antibiotics LAM, NIT, and TMP are denoted by a purple triangle, blue square, and green pentagon, respectively. The observed clustering is highly significant ( $p \approx 3 \times 10^{-4}$ , bootstrap; Methods).

164 We quantified the magnitude of these effects by bottleneck dependency (*BD*) scores (Methods) and  
 165 collected them into a single bottleneck dependency vector per antibiotic. The components of this vector  
 166 describe the interaction between that antibiotic and all six translation bottlenecks. Bottleneck depen-  
 167 dency vectors were diverse (Fig. 3D), indicating that bottlenecks at different stages of the translation  
 168 cycle differentially affect antibiotic efficacy. These results are consistent with the hypothesis that the  
 169 high diversity of drug interactions between translation inhibitors (Fig. 1D) originates in the diversity of  
 170 translation steps targeted by the drugs (Fig. 1A).

171 The bottleneck dependency vector of a given antibiotic provides a quantitative, functional summary  
 172 of its interaction with the translation cycle. In this sense, it is a characteristic “fingerprint” of the antibiotic.  
 173 Clustering of antibiotics based on these bottleneck dependency vectors (Methods) robustly grouped  
 174 together antibiotics with similar mode of action (CRY and FUS, LCY and CHL in Fig. 3E, respectively).  
 175 Further, drug interactions between antibiotics from the same cluster were strictly additive (Figs. 1D and  
 176 3E). These results show that interactions of antibiotics with translation bottlenecks have considerable



177 explanatory power for drug mode of action and indicate that antibiotics acting as substitutes for one  
178 another can be identified based on these interactions.

179 To challenge the predictive power of translation bottlenecks, we tested whether the mode of action  
180 of a partially characterized antibiotic can be inferred from its bottleneck dependency vector. We focused  
181 on lamotrigine (LAM), an anticonvulsant drug which was recently identified to inhibit maturation and in  
182 turn reduce the number of translating ribosomes, potentially by interfering with initiation factor 2 (IF2,  
183 encoded by *infB*) [Stokes *et al.*, 2014]. The bottleneck dependency vector of LAM was most similar to  
184 that of KSG (Fig. 3D,E). As for LAM, a reduction of translating ribosomes is a signature of the initiation  
185 inhibitor KSG [Kaberina *et al.*, 2009]. Hence, this observation further corroborates that the similar  
186 bottleneck dependency vectors for translation inhibitors indicate similar mode of action.

187 We further tested how an antibiotic with a mode of action unrelated to translation interacts with trans-  
188 lation bottlenecks. If drug interactions are primarily determined by their mode of action [Yeh *et al.*, 2006;  
189 Brochado *et al.*, 2018], antibiotics interfering with processes unrelated to translation should be af-  
190 fected similarly by all different translation bottlenecks as the net effects of translation bottlenecks are  
191 indistinguishable – all lead to cessation of protein synthesis. To test this idea, we chose the antibi-  
192 otic trimethoprim (TMP), which inhibits folate synthesis by binding to dihydrofolate reductase and is  
193 not known to directly perturb translation [Walsh, 2003]. Its bottleneck dependency vector indicates  
194 that all bottlenecks alleviated TMP's action to various degrees (Fig. 3D) – a characteristic that is in-  
195 compatible with any of the clusters of translation inhibitors (Fig. 3E). Furthermore, TMP is known to  
196 primarily interact antagonistically or suppressively with translation inhibitors [Bollenbach *et al.*, 2009;  
197 Yeh *et al.*, 2006]. These results support the idea that the effects of specific translation bottlenecks  
198 are diverse for antibiotics targeting translation, but not for antibiotics with modes of action unrelated to  
199 translation.

200 Streptomycin stands out among translation inhibitors, as its action is aggravated by all translation  
201 bottlenecks (Fig. 3D). This might be a consequence of additional unspecific modes of action. We corrob-  
202 orated this by measuring the bottleneck dependency vector of a prodrug nitrofurantoin (NIT). Nitrofuran-  
203 toin has complicated effects on the bacterial cell, including the formation of non-native disulfide bonds  
204 in protein structures [Bandow *et al.*, 2003], DNA damage, and oxidative stress [Mitosch *et al.*, 2017]. A  
205 similar bottleneck dependency between STR and NIT likely reflects that, beyond inhibiting translation,  
206 STR has strong secondary effects: it causes protein mistranslation, changes in membrane potential,  
207 and membrane permeabilization [Davis, 1987]. Some of these processes, in particular the production  
208 of dysfunctional proteins, overlap with those of NIT [Bandow *et al.*, 2003], offering an explanation for the  
209 observed similarity of these seemingly unrelated drugs.

## 210 **2.4 Drug interactions can be predicted from antibiotic responses to translation** 211 **bottlenecks**

212 We reasoned that the effects of translation bottlenecks on antibiotic action should also have predictive  
213 power for drug interactions involving translation inhibitors. We thus sought for a quantitative way of prob-

214 ing the contribution of translation bottlenecks to drug interactions between translation inhibitors. Trans-  
215 lation can be seen as a sequence of steps in which ribosomes progress through the protein production  
216 cycle. Antibiotics and genetic translation bottlenecks hinder this progression similarly by reducing the  
217 transition rates between such steps (Fig. 4A). In cases where an antibiotic specifically targets a single  
218 translation step and reduces the same transition rate as a genetic translation bottleneck, the antibiotic  
219 effect and the genetic translation bottleneck should be equivalent perturbations, *i.e.*, the consequences  
220 of any perturbation elsewhere in the translation cycle should be independent of the exact means by  
221 which such a reduction has been effected (Fig. 4B).

222 To establish the equivalence between translation bottlenecks and antibiotic action, we first trans-  
223 formed the measurements of growth rate as a function of translation factor induction into dose-response  
224 curves of a corresponding idealized antibiotic that targets a single translation step with perfect specificity.  
225 In essence, this procedure converts inducer concentrations into equivalent antibiotic concentrations: the  
226 two concentrations are identified as equivalent if they lead to the same relative growth rate (Fig. 4C,D;  
227 Methods). If the perturbations of factor and antibiotic are equivalent, then the true and idealized antibi-  
228 otic should act as substitutes for each other, and thus exhibit an additive drug interaction. Consequently,  
229 we can use this comparison (Figs. 4C and S4) to test systematically if the action of antibiotics is equiv-  
230 alent to specific translation bottlenecks.

231 We found that the effect of certain translation inhibitors can be almost perfectly mimicked by trans-  
232 lation bottlenecks. Within our selection of antibiotics, several strong candidates for equivalent perturba-  
233 tions exist (Fig. 1A): CRY, FUS and STR with EF-G (translocation); KSG with IF2 (initiation); and TET  
234 with EF-Tu (tRNA-delivery). For example, remapping the response surface of CRY and EF-G yields an  
235 additive surface (Fig. 4E), corroborating that CRY and the EF-G translocation bottleneck are equiva-  
236 lent perturbations. In contrast, if the bottleneck is not equivalent to the drug, remapping does not yield  
237 an additive response surface; an example is CRY and the recycling bottleneck (Fig. 4F,ii). In general,  
238 demonstrating that an antibiotic acts as an equivalent perturbation to a specific translation factor pro-  
239 vides strong evidence for its primary mode of action, since translation factors are thought to control  
240 individual steps with high specificity.

241 For antibiotics that are equivalent to specific translation factors (Fig. 4F), drug interactions with other  
242 antibiotics can be directly explained and predicted. In practice, this is done by remapping the antibiotic-  
243 translation factor response surfaces as described above (Fig. 5A,B). The resulting prediction will be  
244 faithful if the drug interaction originates exclusively from the combination of two bottlenecks in the trans-  
245 lation cycle. Drug interactions predicted using this procedure were often highly accurate (Fig. 5C). In  
246 particular, some of the most striking cases of antagonistic and suppressive interactions were correctly  
247 predicted. For example, the suppressive interaction of CHL with FUS was correctly predicted, including  
248 its direction: FUS loses potency when exposed to CHL (Fig. 5C-i). Further, the prediction of antagonism  
249 between CHL and STR was qualitatively correct (Fig. 5C-ii). Similarly, prediction of these interactions  
250 with FUS and STR were also correct for LCY (Fig. S5) which is similar to CHL (Fig. 3E). The remapping  
251 approach further correctly predicted the prevalent antagonism and suppression of the initiation inhibitor

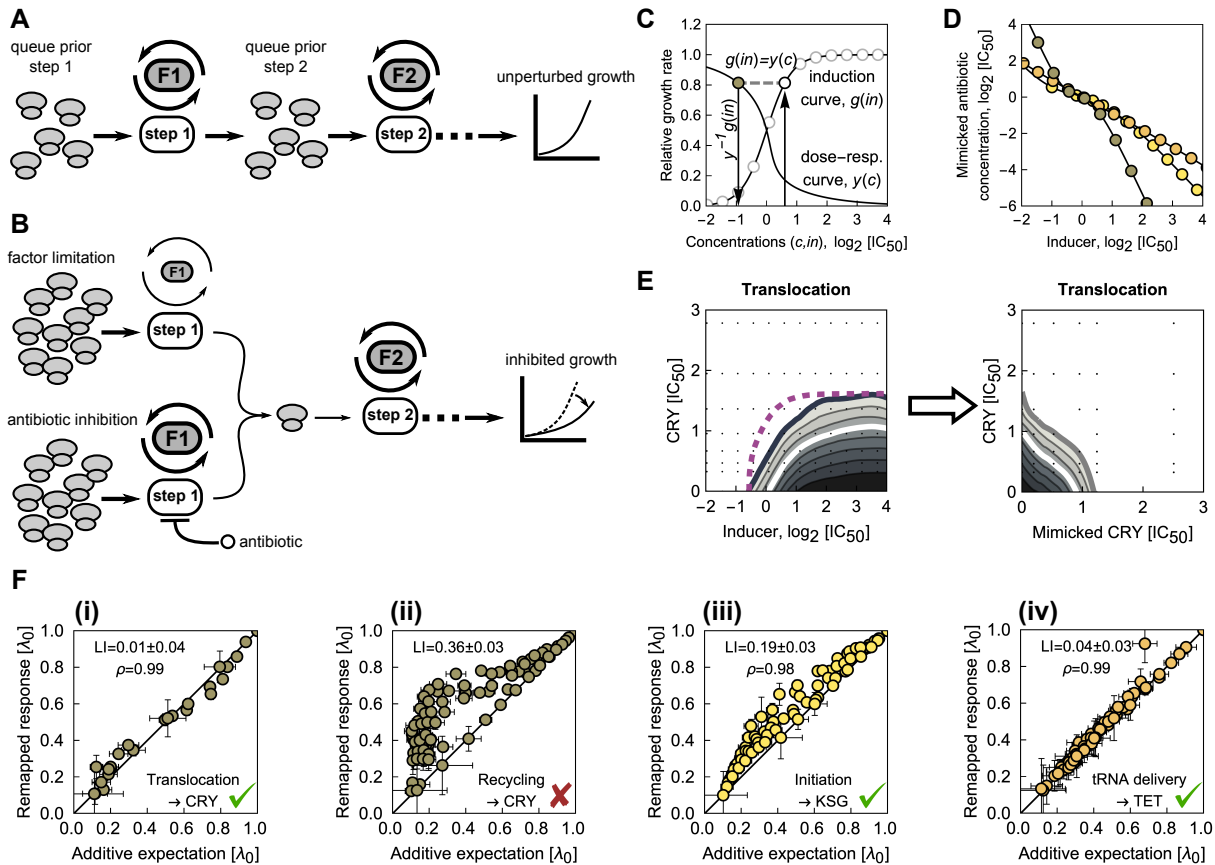

**Figure 4: Translation factor deprivation mimics the action of equivalent antibiotics.** (A) Schematic of translation as a sequence of steps (white), catalyzed by translation factors (gray). In the absence of perturbations, ribosomes progress through the steps unimpeded, resulting in unperturbed growth. (B) Schematic of perturbed translation. Top: as the abundance of factor F1 is lowered (smaller factor symbol), the rate of step 1 decreases (thinner arrows) and ribosomes queue in front of the bottleneck. Bottom: the same rate is reduced by an antibiotic. The effects of factor deprivation and antibiotic action on growth are equivalent. (C) Schematic of conversion of inducer concentration  $in$  (here for the translocation factor) into the mimicked antibiotic concentration  $c$  (here: CRY). For each inducer concentration  $in$ , the growth rate from the induction curve  $g(in)$  is determined and the same growth rate on the antibiotic dose-response curve  $y(c)$  is identified (gray dashed line); the inverse function of the dose-response curve yields the equivalent antibiotic concentration as  $c = y^{-1}(g(in))$ . (D) Resulting conversion of inducer concentration  $c_i$  into antibiotic concentration  $c$  for three different pairs of equivalent perturbations: CRY-translocation (gray), KSG-initiation (yellow) and TET-tRNA delivery (orange). (E) Inducer-antibiotic response surface (left) and mimicked antibiotic-antibiotic response surface (right) upon conversion of inducer concentration as in (C) and (D). Purple dashed line shows isobole for multiplicative responses at relative growth rate 0.2. The remapped response surface is additive, corroborating the equivalence of CRY and translocation factor deprivation. (F) Comparison of response surfaces remapped as in E to the additive expectation. The bottlenecks and antibiotics are shown on the bottom right, respectively. Errors in  $LI$  and in expected and remapped responses were evaluated by bootstrapping (Methods). (i) Example from (E): additive expectation and remapped response surface agree ( $\rho = 0.99$ ). (ii) As (i), but for a recycling bottleneck. The large and statistically significant discrepancy in  $LI$  from 0 indicates that CRY and recycling bottleneck are not equivalent (Methods, Fig. S4). (iii) As (i), but for KSG and initiation bottleneck ( $\rho = 0.98$ ). (iv) As (i), but for TET and tRNA delivery bottleneck ( $\rho = 0.99$ ).

252 KSG with other translation inhibitors (Fig. 1D). Remapping qualitatively accounted for all observed inter-  
 253 actions of KSG with quantitative agreement in several cases, including KSG-CHL (Fig. 5A-ii) and  
 254 KSG-STR (Fig. 5C-iv and SI). Thus, several drug interactions with previously elusive mechanisms are

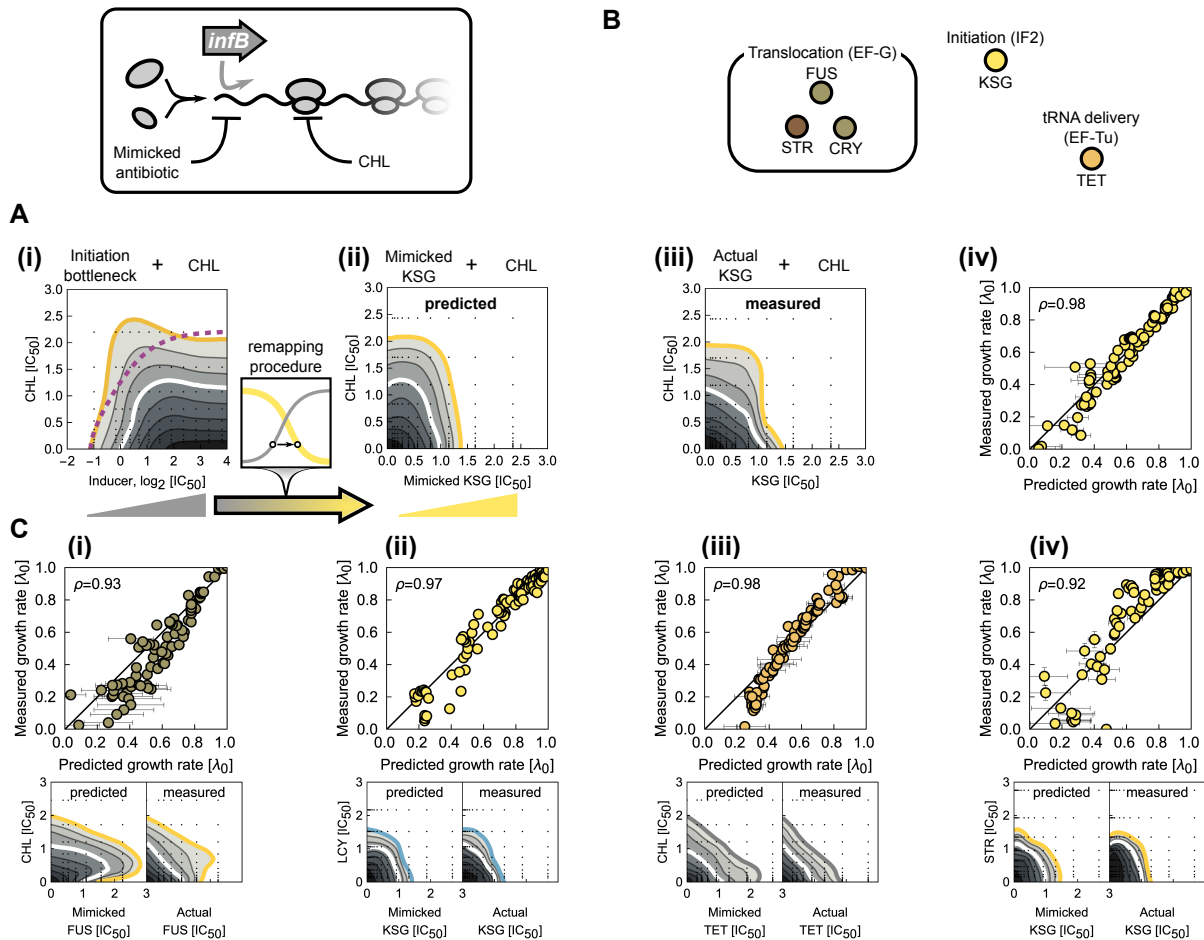

**Figure 5: Equivalent translation bottlenecks can predict antibiotic interactions.** (A) Example of drug interaction prediction based on equivalent translation bottlenecks. (i) Response surface of CHL combined with the inducer for the initiation (*infB*) bottleneck shows mild alleviation. This response surface contains information about the interaction between CHL and any antibiotic that interferes with initiation. The inducer axis is remapped into mimicked antibiotic concentration (lower box; Fig. 4C-E). (ii) Resultant prediction of response surface for the initiation-inhibiting antibiotic KSG and CHL. (iii) Measured KSG-CHL response surface for direct comparison; strong antagonism is observed as predicted. (iv) Point-by-point comparison of predicted and measured response surfaces (Pearson's  $\rho = 0.98$ ). (B) Schematic showing antibiotics and their equivalent translation factor bottlenecks. Drug interactions with these antibiotics can be predicted for any antibiotic with known response to the equivalent bottleneck. Color-code shows cluster identity from Fig. 3E. (C) Comparison of predicted and measured response surfaces for different antibiotics in combination with antibiotics that have a factor analog. Top row: scatter plots as in A-iv; bottom row: predicted and measured response surfaces, respectively. (i) Suppression of FUS by CHL at high inhibition is correctly predicted. (ii) Antagonistic interaction between KSG-LCY (KSG is mimicked by initiation bottleneck) is correctly predicted. (iii) Additivity between CHL-TET based on mimicking TET by a tRNA delivery bottleneck is correctly predicted. (iv) Strong antagonism between KSG and STR based on mimicking KSG by an initiation bottleneck is correctly predicted.

255 explained by the interplay of the specific steps in the translation cycle that are targeted by the constituent  
 256 antibiotics.

257 Our approach further explained nontrivial additive interactions. In particular, the additive interaction  
 258 between CHL and TET is hard to rationalize: these antibiotics have completely different binding sites on  
 259 the ribosome. However, CHL and TET interacted similarly with translation bottlenecks (Fig. 3E) and their

260 interaction was faithfully captured by the remapping approach (Fig. 5C-iii). This observation suggests  
261 that the action of CHL is largely equivalent to inhibiting tRNA delivery. As CHL binding interferes with a  
262 distal end of tRNA on the A-site [Wilson, 2014], this suggests that perturbation of tRNA dynamics is at  
263 the heart of the drug interaction between TET and CHL. KSG and ERM constitute another antibiotic pair  
264 that interacted additively and was clustered together. Remapping correctly predicted additivity between  
265 KSG-ERM (SI); however, ERM does not directly inhibit initiation as does KSG (Table 1). Yet, it is likely  
266 that the inability of ERM to inhibit translation when the nascent peptide chain is extended beyond a  
267 certain length effectively leads to a functional equivalence, which results in additivity and co-clustering  
268 of ERM and KSG.

269 For certain antibiotic pairs, the predictions based on equivalent translation bottlenecks failed to ex-  
270 plain the observed drug interactions (*e.g.*, for LCY-CRY and CHL-CRY; SI), indicating that these in-  
271 teractions have origins outside of the translation cycle. We expect that these cases are often due  
272 to idiosyncrasies of the drugs, which will require separate in depth characterization in each case. In  
273 contrast, our results show that various non-trivial drug interactions between antibiotics are systemati-  
274 cally explained by the interplay of specific bottlenecks in the translation cycle that are caused by the  
275 antibiotics. While the growth-law based biophysical model already explained  $\approx 57\%$  (16 of 28) of the  
276 observed interactions (Fig. S2), suppressive interactions were only captured after taking into account  
277 the multi-step nature of translation (Fig. S5), thus increasing the explained fraction to  $\approx 71\%$  (20 of 28).  
278 If suppressive drug interactions are caused by the interplay of different translation bottlenecks alone, it  
279 should be possible to recapitulate these interactions in a purely genetic way. We thus expanded our ap-  
280 proach of using genetic translation bottlenecks as proxies for antibiotics by introducing multiple genetic  
281 bottlenecks simultaneously in the same cell.

## 282 **2.5 Simultaneous titration of translation factors reveals robust suppression be-** 283 **tween translocation and initiation inhibition**

284 We focused on the interactions between initiation inhibitors (such as KSG) and translocation inhibitors  
285 (such as CRY, STR, FUS) as they were exclusively antagonistic or suppressive (Fig. 1D). Moreover, the  
286 initiation inhibitor KSG alleviated a genetic translocation bottleneck and an initiation bottleneck in turn  
287 suppressed the effect of the translocation inhibitor FUS (Fig. 3C). These observations suggest that a  
288 universal mechanism underlies the suppression between initiation and translocation inhibitors.

289 Thus, we constructed a synthetic strain that enables simultaneous independent control of initiation  
290 and translocation factor levels. We integrated the initiation and translocation factors outside their native  
291 loci under tight control of promoters inducible by IPTG and anhydrotetracycline (aTc), respectively, in  
292 a strain in which their endogenous copies were deleted (Figs. 6A and S6; Methods). To maximize  
293 the precision of induction that is achievable with different inducer concentrations, we put both factors  
294 under negative autoregulatory control by chromosomally integrated repressors [Klumpp *et al.*, 2009;  
295 Scott *et al.*, 2010]. The resulting strain showed no growth when at least one of the inducers was absent  
296 but wild type growth was fully rescued in the presence of both inducers (Fig. 6B). These observations

297 confirm that both translation factors are essential and show that their expression can be varied over  
298 the entire physiologically relevant dynamic range, thus enabling quantitative genetic control of two key  
299 translation processes.

300 Curtailing translation initiation suppresses the effect of a genetic translocation bottleneck. We de-  
301 termined the bacterial response to varying translocation and initiation factor levels by measuring growth  
302 rates over finely resolved two-dimensional concentration gradients of both inducers. The resulting re-  
303 sponse surface clearly showed that inhibition of initiation alleviates the effect of translocation inhibition  
304 (Figs. 6C and S6). This phenomenon exactly mirrors the antibiotic-antibiotic (KSG-FUS, Fig. 1D) and  
305 bottleneck-antibiotic interactions (initiation-FUS, Fig. 3C). Note that an all-or-nothing approach (Fig. 6B),  
306 which is analogous to common genetic epistasis measurements [Constanzo *et al.*, 2010], would miss  
307 this suppressive effect, highlighting the importance of the quantitatively controlled perturbations we  
308 used. Taken together, these data show that the interplay of translation initiation and translocation alone  
309 is sufficient to produce strong suppression: dialing down initiation cranks up growth stalled by transloca-  
310 tion bottlenecks. The widespread suppression between antibiotics targeting initiation and translocation  
311 is thus explained as a general consequence of the combined inhibition of specific translation steps  
312 alone.

313 What is the underlying mechanism of the suppressive interaction between initiation and transloca-  
314 tion inhibitors? We hypothesized that this suppression results from alleviating ribosome “traffic jams”  
315 that occur during translation of transcripts when the translocation rate is low (Fig. 6D). The traf-  
316 fic of translating ribosomes that move along mRNAs can be dense [Mitarai *et al.*, 2008] and when  
317 a ribosome gets stuck (*e.g.*, due to a low translocation rate), it blocks the translocation of subse-  
318 quent ribosomes. The resulting situation is similar to a traffic jam of cars on a road. Traffic jams  
319 form due to asynchronous movement and stochastic progression of particles in discrete jumps, which  
320 is a good approximation for the molecular dynamics of a translating ribosome. If particle progres-  
321 sion were deterministic and synchronous, no traffic jams would form. A classic model of queued  
322 traffic progression, which can be applied to protein translation [MacDonald *et al.*, 1968; MacDonald  
323 and Gibbs, 1969], is the Totally Asymmetric Simple Exclusion Process (TASEP) [Shaw *et al.*, 2003;  
324 Zia *et al.*, 2011].

325 We developed a variant of the TASEP that describes the traffic of translating ribosomes on mRNAs  
326 and takes into account the laws of bacterial cell physiology. There are several differences between the  
327 classic TASEP and translating ribosomes moving along a transcript. First, a ribosome does not merely  
328 occupy a single site (codon), but rather extends over 16 codons [Kang and Cantor, 1985]. Second, the  
329 total number of ribosomes in the cell is finite and varies as dictated by bacterial growth laws [Scott *et al.*,  
330 2010; Scott *et al.*, 2014]. Third, translation steps are mediated by translation factors that bind to the ri-  
331 bosome in a specific state and push the ribosome into another state [Rodnina, 2018]. These transitions  
332 are stochastic with rates that depend on the abundance of ribosomes in a specific state and on the abun-  
333 dance of translation factors available to catalyze the step. Thus, the initiation and translocation-attempt  
334 rates, which are constants in the classic TASEP, depend on the state of the system. We formulated a

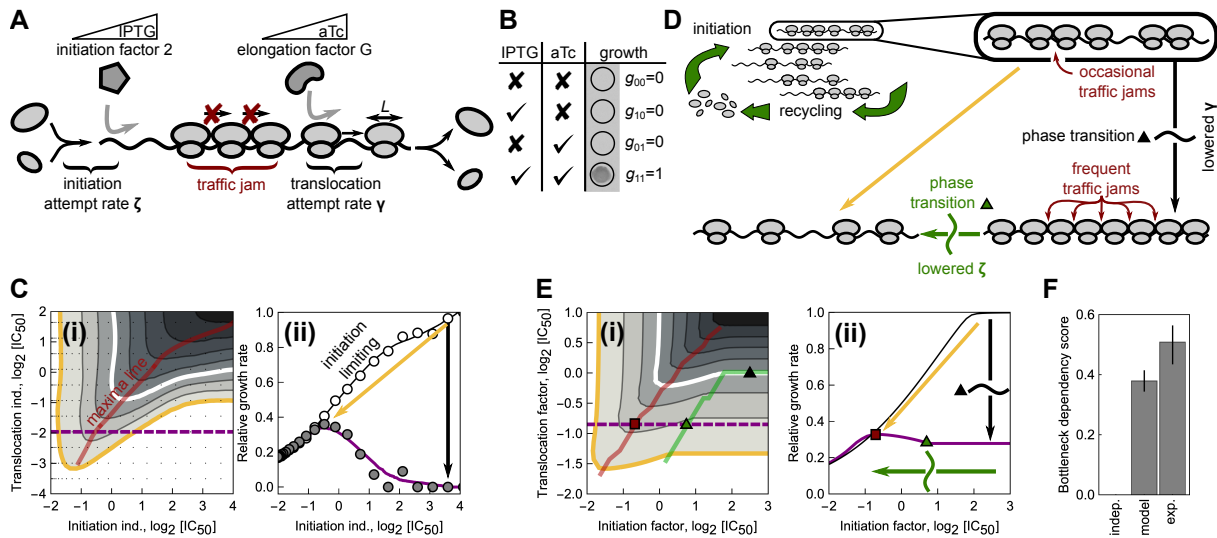

**Figure 6: Suppression between inhibition of translocation and initiation is explained by dissolution of ribosome traffic jams in a phase transition.** (A) Schematic of ribosomes progressing along a transcript – a stuck ribosome can cause a traffic jam. Ribosomes undergo factor-mediated initiation events with attempt rate  $\zeta$  and translocation with attempt rate  $\gamma$ . Expression of initiation and elongation factor G (translocation) are controlled by level of inducer (IPTG and aTc, respectively). (B) Results of all-or-nothing growth assay: bacteria grow only when both essential factors are induced. (C;i) Measured growth rate response surface for the dual inducible promoter strain from (A) as a function of both inducer concentrations; red line shows ridge of maximum growth. (C;ii) Cross-section of the response surface along dashed purple line in (i) (gray circles) and at maximal aTc induction (white circles); solid lines are smoothed profiles. Black arrow denotes decrease in translocation; if initiation is lowered simultaneously with translocation (orange arrow), growth reduction is smaller. (D) Schematic of theoretical model: translation is described as an ensemble of transcripts competing for the limited and growth-rate-dependent pool of ribosomes. Ribosomes advance on transcripts as described by a generalized totally asymmetric simple exclusion process (TASEP) for particles of size  $L$ , see (A) and text. When  $\gamma < \zeta(1 + L^{1/2})$ , ribosomes saturate and traffic jams develop, resulting in a drop in elongation and growth (black arrow, transition happens at black triangle) (Methods, [Klumpp and Hwa, 2008; Lakatos and Chou, 2003]). When  $\zeta < \gamma/(1 + L^{1/2})$ , a phase transition occurs (green triangle): traffic jams dissolve; elongation and growth increase (along the green arrow). (E;i) Growth rate predicted by the generalized TASEP model recapitulates suppression of translocation inhibition by lowered initiation; note that, unlike in (C), axes show the concentrations of translation factors. States below and to the right of the green line are in the translocation limiting regime. (E;ii) Cross-sections of the response surface: solid purple line corresponds to dashed purple line in (i). As the initiation factor level is decreased, the critical point of the phase transition (green triangle) is reached; growth starts increasing after passing the critical point, and decreases again after passing the maximum (red square) as the number of translating ribosomes becomes limiting. (F) Bottleneck dependency (BD) score quantifies the deviation from independent expectation ( $BD = 0$ ) for the response surfaces in (C;i) and (E;i); error bars are 5%-95% bootstrap intervals.

335 generalized TASEP that captures these extensions, estimated all of its parameters based on literature,  
 336 and derived the model equations analytically (Methods); the resulting growth rate was calculated nu-  
 337 merically. In brief, our generalized TASEP model provides a physiologically-realistic description of the  
 338 factor-mediated traffic of ribosomes on multiple transcripts.

339 Without any free parameters, the generalized TASEP qualitatively reproduced the suppressive ef-  
 340 fect of lowering the initiation rate under a translocation bottleneck (Fig. 6E). This suppression results  
 341 from a phase transition between the translocation- and the initiation-limited regime (Methods). In the  
 342 translocation-limited regime (black arrow in Fig. 6E-ii), ribosome traffic is dense and cannot be further

343 increased by boosting the initiation attempt rate. Upon decreasing the initiation attempt rate  $\alpha$  (green  
344 arrow in Fig. 6E-ii), a phase transition to the initiation-limited regime occurs. Beyond the critical point  
345 of this phase transition (green triangle in Fig. 6E-ii), the elongation velocity, and with it the growth rate,  
346 begins to increase with decreasing initiation attempt rate. Thus, ultimately, a non-equilibrium phase tran-  
347 sition in which ribosome traffic jams dissolve underlies the suppressive effect. To compare measured  
348 and predicted surfaces that have different axes, we calculated their deviation from independence as for  
349 the bottleneck dependency score (Figs. 3D and S3). By this measure, the model faithfully captured the  
350 clear deviation from the multiplicative expectation (Fig. 6F); the agreement with the experimental data is  
351 surprisingly good, especially since the model results are parameter-free and not a fit to the experimental  
352 data.

353 Taken together, these results show that suppressive drug interactions between translation inhibitors  
354 are caused by the interplay of two different translation bottlenecks. Close agreement of the experiments  
355 with a plausible theoretical model of ribosome traffic, which captures physiological feedback mediated  
356 by growth laws, strongly suggests that suppression is caused by ribosome traffic jams. Such traffic  
357 jams result from imbalances between translation initiation and translocation; they dissolve in a phase  
358 transition that occurs when one of these processes is slowed, leading to an overall acceleration of  
359 translation and growth. Thus, a non-equilibrium phase transition in ribosome traffic is at the heart of  
360 suppressive drug interactions between antibiotics targeting translation initiation and translocation.

### 361 **3 Discussion**

362 We established a framework that combines mathematical modeling, high-throughput growth rate mea-  
363 surements, and genetic perturbations to elucidate the underlying mechanisms of drug interactions be-  
364 tween antibiotics inhibiting translation. Kinetics of antibiotic-target binding and transport together with  
365 the “growth laws”, *i.e.*, bacterial response to translation inhibition (Fig. 2), form a biophysically-realistic  
366 baseline model for predicting antibiotic interactions from properties of individual antibiotics alone. This  
367 model explained some interactions, but not all, failing specifically on suppressive interactions. Predic-  
368 tions improved by taking into account the step-wise progression of ribosomes through the translation  
369 cycle (Fig. 4, 5). This was achieved by mimicking antibiotic perturbations of this progression genetically,  
370 which directly identified the contribution of antibiotic-imposed translation bottlenecks to the observed  
371 drug interactions. Finally, to explain the origin of suppressive interactions unaccounted for by the bio-  
372 physical model, we modeled the traffic of translating ribosomes explicitly. Our results show that translo-  
373 cation inhibition can cause ribosomal traffic jams, which dissolve in a non-equilibrium phase transition  
374 when initiation is inhibited simultaneously with translocation, thereby restoring growth (Fig. 6). This  
375 phase transition explains the suppressive drug interactions between antibiotics targeting initiation and  
376 translocation.

377 Taken together, our framework mechanistically explains twenty out of twenty-eight observed drug  
378 interactions (Fig. 1, S2, S5), as judged by highly stringent quantitative and statistical criteria (Methods).



379 Here, even the cases rejected as quantitatively different are insightful. For example, the remapping-  
380 based prediction of CHL-FUS interaction (Fig. 5C-ii) over-estimates the suppression and is rejected on  
381 quantitative basis; yet remapping correctly suggests the occurrence of suppression and its direction.  
382 Qualitative observations like these deepen our understanding of drug interactions as they highlight  
383 potential mechanisms of drug interaction, on top of which additional mechanisms are acting. While we  
384 focused on translation inhibitors, key elements of our framework can be generalized to drugs with other  
385 modes of action. Specifically, when considering a drug that targets a specific process mediated by an  
386 essential enzyme, our method of equating the deprivation of the enzyme with the action of an antibiotic  
387 is readily applicable.

388 Mimicking the effects of two drugs with controllable genetic perturbations generalizes the concept  
389 of genetic epistasis to continuous perturbations. Epistasis studies compare the effects of double gene  
390 knockouts to those of single knockouts and identify epistatic interactions – an approach that can reveal  
391 functional modules in the cell [Segre *et al.*, 2005; Tong *et al.*, 2004; Constanzo *et al.*, 2010]. Our results  
392 show that continuous genetic perturbations provide essential additional information on genetic inter-  
393 actions (Fig. 6). Firstly, the direction of epistatic interactions cannot be extracted from measurements  
394 of single and double mutants. Secondly, the quantitative information obtained from such “continuous  
395 epistasis” measurements provides more stringent constraints for mathematical models of biological sys-  
396 tems. In particular, continuous epistasis data can be powerful for the development of whole-cell models  
397 that describe the interplay of different functional modules in the cell. Thirdly, this approach allows in-  
398 cluding essential genes in epistatic interaction networks even for haploid organisms, which otherwise  
399 requires the use of less well-defined hypomorphs. Thus, continuous epistasis measurements as in  
400 Fig. 6C augment all-or-nothing genetic perturbations.

401 Continuous epistasis measurements further enable a deeper understanding of previously mysteri-  
402 ous antibiotic resistance mutations. Specifically, translation bottlenecks that alleviate the effect of an  
403 antibiotic expose a latent potential for resistance development. Indeed, mutations leading to effects  
404 that are equivalent to factor-imposed bottlenecks occur under antibiotic selection pressure. For ex-  
405 ample, resistance to ERM in *E. coli* can be conferred by mutations in proteins of the large ribosomal  
406 subunit, which hinder its maturation and lower its stability [Zaman *et al.*, 2007]. Consistent with this  
407 observation, our results indicate that the action of ERM is alleviated by lowering the stability of the 50S  
408 subunit (Fig. 3D). Furthermore, mutations in recycling factor were selected in *Pseudomonas aerugi-*  
409 *nosa* evolved for resistance to the TET derivative tigecycline [Sanz-Garcia *et al.*, 2018]. The observed  
410 alleviation of TET action by a recycling bottleneck (Fig. 3D) offers a mechanistic explanation for the ben-  
411 efiticial effects of these mutations. Mutations in other genes predicted based on the effect of translation  
412 bottlenecks may be difficult to observe, especially in clinical isolates, due to the associated fitness cost  
413 and selection pressure for reverting the mutations in the absence of the antibiotic. Beyond mutations  
414 conferring resistance to individual drugs, consistent or conflicting dependencies of different antibiotics  
415 on translation bottlenecks may further indicate the potential for evolving cross-resistance and collateral  
416 sensitivity, respectively [Baym *et al.*, 2016].

417 In conclusion, we presented a systematic approach for discovering the mechanistic origins of drug  
418 interactions between antibiotics targeting translation. As the translation machinery is highly conserved,  
419 the interaction mechanisms for drugs targeting specific steps of translation we uncovered may gen-  
420 eralize to diverse other organisms. Our approach of mimicking drug effects with continuous genetic  
421 perturbations is general and can be extended to antibiotics with other primary targets, other types of  
422 drugs, and other organisms. Our quantitative analysis relies on the established correlation between  
423 ribosome content and growth rate in varying nutrient environments [Scott *et al.*, 2010]. This highlights  
424 the importance of elucidating such growth laws in other organisms for gaining a deeper understanding  
425 of combined drug action. In the long run, extending our combined experimental-theoretical approach  
426 to other types of drugs and other biological systems will enhance our understanding of drug modes of  
427 action and interaction mechanisms and provide deeper insights into cell physiology.

## 428 **4 Acknowledgments**

429 We thank M. Hennessey-Wesen, I. Tomanek, K. Jain, A. Staron, K. Tomasek, M. Scott, and Z. Gitai for  
430 reading the manuscript and constructive comments. K.B. is indebted to C. Guet for additional guidance  
431 and generous support which rendered this work possible. K.B. thanks all members of Guet group for  
432 many helpful discussions and sharing of resources. K.B. additionally acknowledges the tremendous  
433 support from A. Angermayr and K. Mitosch with experimental work. We further thank E. Brown for help-  
434 ful comments regarding lamotrigine. This work was supported in part by Austrian Science Fund (FWF)  
435 standalone grants P 27201-B22 (to T.B.) and P 28844 (to G.T.), HFSP program Grant RGP0042/2013 (to  
436 T.B.), and German Research Foundation (DFG) Collaborative Research Centre (SFB) 1310 (to T.B.).

## 437 **5 Author contributions**

438 Conceptualization, methodology, formal analysis, investigation, writing – original draft, writing – review  
439 & editing: K.B., G.T., and T.B. Funding acquisition, resources, and supervision: G.T., and T.B.

## 440 **6 Declaration of Interests**

441 The authors declare no competing interests.

## References

- 442
- 443 [Baba *et al.*, 2006] T. Baba, T. Ara, M. Hasegawa, Y. Takai, Y. Okumura, M. Baba, K.A. Datsenko, M. Tomita, B.L.  
444 Wanner, and H. Mori, "Construction of *Escherichia coli* K-12 in-frame, single-gene knockout mutants: the Keio  
445 collection," *Mol. Syst. Biol.*, 2, 2006.
- 446 [Bandow *et al.*, 2003] J.L. Bandow, H. Brätz, L.I.O. Leichert, H. Labischinski, and M. Hecker, "Proteomic Approach  
447 to Understanding Antibiotic Action," *Antimicrob Agents Chemother*, 47(3), 2003.
- 448 [Bartholomäus *et al.*, 2016] A. Bartholomäus, I. Fedyunin, P. Feist, C. Sin, G. Zhang, A. Valleriani, and Z. Ignatova,  
449 "Bacteria differently regulate mRNA abundance to specifically respond to various stresses," *Phil. Trans. R. Soc.*,  
450 374, 2016.
- 451 [Baym *et al.*, 2016] M. Baym, L.K. Stone, and R. Kishony, "Multidrug evolutionary strategies to reverse antibiotic  
452 resistance," *Science*, 351, 2016.
- 453 [Belousoff *et al.*, 2011] M.J. Belousoff *et al.*, "Crystal structure of the synergistic antibiotic pair, lankamycin and  
454 lankacidin, in complex with the large ribosomal subunit," *Proc. Nat. Acad. Sci. USA*, 107(7), 2011.
- 455 [Blanchard *et al.*, 2010] S.C. Blanchard, B.S. Cooperman, and D.N. Wilson, "Probing Translation with Small-  
456 Molecule Inhibitors," *Chem. Biol.*, 17(6), 2010.
- 457 [Blumenthal *et al.*, 1976] R.M. Blumenthal, P.G. Lemaux, F.C. Neidhardt, and P.P. Dennis, "The Effects of the *relA*  
458 Gene on the Synthesis of Aminoacyl-tRNA Synthetases and Other Transcription and Translation Proteins in  
459 *Escherichia coli* B," *Molec. gen. Genet.*, 149, 1976.
- 460 [Bollenbach, 2015] T. Bollenbach, "Antimicrobial interactions: mechanisms and implications for drug discovery and  
461 resistance evolution," *Curr Opin Microbiol*, 27:1, 2015.
- 462 [Bollenbach *et al.*, 2009] T. Bollenbach, S. Quan, R. Chait, and R. Kishony, "Nonoptimal Microbial Response to  
463 Antibiotics Underlies Suppressive Drug Interactions," *Cell*, 139:707, 2009.
- 464 [Bremer and Dennis, 1996] H. Bremer and P.P. Dennis, "Modulation of Chemical Composition and Other Paramete-  
465 ters of the Cell by Growth Rate," In F.C. Neidhardt, editor, *Escherichia coli and Salmonella*. ASM Press, Wash-  
466 ington DC, 1996.
- 467 [Brochado *et al.*, 2018] A.R. Brochado *et al.*, "Species-specific activity of antibacterial drug combinations," *Nature*,  
468 559, 2018.
- 469 [Chadani *et al.*, 2011] Y. Chadani, K. Ono, K. Kutsukake, and T. Abo, "*Escherichia coli* YaeJ protein mediates a  
470 novel ribosome-rescue pathway distinct from SsrA- and ArfA-mediated pathways," *Mol. Microbiol.*, 80, 2011.
- 471 [Chait *et al.*, 2007] R. Chait, A. Craney, and R. Kishony, "Antibiotic interactions that select against resistance,"  
472 *Nature*, 446:668, 2007.
- 473 [Cherepanov and Wackernagel, 1995] P.P. Cherepanov and W. Wackernagel, "Gene disruption in *Escherichia coli*:  
474 Tc<sup>R</sup> and Km<sup>R</sup> cassettes with the option of Flp-catalyzed excision of the antibiotic-resistance determinant," *Gene*,  
475 158:9, 1995.
- 476 [Chevereau and Bollenbach, 2015] G. Chevereau and T. Bollenbach, "Systematic discovery of drug interaction  
477 mechanisms," *Mol. Syst. Biol.*, 11:807, 2015.
- 478 [Cleveland and Devlin, 1988] W.S. Cleveland and S.J. Devlin, "Locally Weighted Regression: An Approach to  
479 Regression Analysis by Local Fitting," *J Am Stat Assoc.*, 83(403), 1988.

- 480 [Cole *et al.*, 1987] J.R. Cole, C.L. Olsson, J.W.B. Hershey, M. Grunberg-Manago, and M. Nomura, "Feedback  
481 Regulation of rRNA Synthesis in *Escherichia coli* Requirement for Initiation Factor IF2," *J. Mol. Biol.*, 198:383,  
482 1987.
- 483 [Constanzo *et al.*, 2010] M. Constanzo *et al.*, "The Genetic Landscape of a Cell," *Science*, 327, 2010.
- 484 [Dai *et al.*, 2016] X Dai, M Zhu, M Warren, R Balakrishnan, V Patsalo, H Okano, JR Williamson, K Fredirck,  
485 YP Wang, and T Hwa, "Reduction of translating ribosomes enables *Escherichia coli* to maintain elongation  
486 rates during slow growth," *Nature Microbiology*, 2(16231), 2016.
- 487 [Datsenko and Wanner, 2000] K.A. Datsenko and B.L. Wanner, "One-step inactivation of chromosomal genes in  
488 *Escherichia coli* K-12 using PCR products," *Proc. Nat. Acad. Sci. USA*, 96(12), 2000.
- 489 [Datta *et al.*, 2006] S. Datta, N. Constantino, and D.L. Court, "A set of recombineering plasmids for gram-negative  
490 bacteria," *Gene*, 379, 2006.
- 491 [Davis, 1987] B.D. Davis, "Mechanism of Bactericidal Action of Aminoglycosides," *Microbiol Rev*, 51(3), 1987.
- 492 [Falconer *et al.*, 2011] S.B. Falconer, T.L. Czarny, and E.D. Brown, "Antibiotics as probes of biological complexity,"  
493 *Nat. Chem. Biol.*, 7:415, 2011.
- 494 [Furano and Wittel, 1975] A.V. Furano and F.P. Wittel, "Syntheses of Elongation Factors Tu and G Are under  
495 Stringent Control in *Escherichia coli*," *J. Biol. Chem.*, 251(3), 1975.
- 496 [Garcia *et al.*, 2011] H.G. Garcia, H.J. Lee, J.Q. Boedicker, and R. Phillips, "Comparison and Calibration of Differ-  
497 ent Reporters for Quantitative Analysis of Gene Expression," *Biophys. J.*, 101, 2011.
- 498 [Gordon, 1970] J. Gordon, "Regulation of the in vivo synthesis of the polypeptide chain elongation factors in  
499 *Escherichia coli*," *Biochemistry*, 9, 1970.
- 500 [Greulich *et al.*, 2015] P. Greulich, M. Scott, M.R. Evans, and R.J. Allen, "Growth-dependent bacterial susceptibility  
501 to ribosome-targeting antibiotics," *Mol. Syst. Biol.*, 11:796–807, 2015.
- 502 [Harms *et al.*, 2004] J.M. Harms *et al.*, "Alterations at the peptidyl transferase centre of the ribosome induced by  
503 the synergistic action of the streptogramins dalpofristin and quinupristin," *BMC Biol.*, 2, 2004.
- 504 [Kaberina *et al.*, 2009] A.C. Kaberdina, W. Szaflarski, K.H. Nierhaus, and I. Moll, "An Unexpected Type of Ribo-  
505 somes Induced by Kasugamycin: A Look into Ancestral Times of Protein Synthesis?," *Mol. Cell*, 33(2), 2009.
- 506 [Kang and Cantor, 1985] C. Kang and C.R. Cantor, "Structure of Ribosome-bound Messenger RNA as Revealed  
507 by Enzymatic Accessibility Studies," *J. Mol. Biol.*, 181, 1985.
- 508 [Keiler, 2015] K.C. Keiler, "Mechanisms of ribosome rescue in bacteria," *Nat. Rev. Microbiol.*, 13, 2015.
- 509 [Kishony and Leibler, 2003] R. Kishony and S. Leibler, "Environmental stresses can alleviate the average deleteri-  
510 ous effect of mutations," *J. Biol.*, 2:14, 2003.
- 511 [Kitagawa *et al.*, 2005] M. Kitagawa, T. Ara, M. Arifuzzaman, T. Ioka-Nakamichi, E. Inamoto, H. Toyonaga, and  
512 H. Mori, "Complete set of ORF clones of *Escherichia coli* ASKA library (A Complete Set of *E. coli* K-12 ORF  
513 Archive): Unique Resources for Biological Research," *DNA Research*, 12:291, 2005.
- 514 [Klumpp and Hwa, 2008] S. Klumpp and T. Hwa, "Stochasticity and traffic jams in the transcription of ribosomal  
515 RNA: Intriguing role of termination and antitermination," *Proc. Nat. Acad. Sci. USA*, 105:18159, 2008.
- 516 [Klumpp *et al.*, 2009] S. Klumpp, Z. Zhang, and T. Hwa, "Growth Rate-Dependent Global Effects on Gene Expres-  
517 sion in Bacteria," *Cell*, 130:1366, 2009.

- 518 [Lakatos and Chou, 2003] G. Lakatos and T. Chou, "Totally asymmetric exclusion processes with particles of  
519 arbitrary size," *J. Phys. A: Math. Gen.*, 36, 2003.
- 520 [Lazar *et al.*, 2013] V. Lazar *et al.*, "Bacterial evolution of antibiotic hypersensitivity," *Mol. Syst. Biol.*, 9, 2013.
- 521 [Lennox, 1955] E.S. Lennox, "Transduction of linked genetic characters of the host by bacteriophage P1," *Virology*,  
522 1, 1955.
- 523 [Loewe and Muischnek, 1926] S. Loewe and H. Muischnek, "Über kombinationswirkungen," *Archiv f. experiment.*  
524 *Pathol. u. Pharmakol.*, 114, 1926.
- 525 [Lutz and Bujard, 1997] R. Lutz and H. Bujard, "Independent and tight regulation of transcriptional units in *Es-*  
526 *cherichia coli* via the LacR/O, the TetR/O and AraC/I<sub>1</sub>-I<sub>2</sub> regulatory elements," *Nucleic Acids Res*, 25(6):1203,  
527 1997.
- 528 [Maaløe, 1979] O. Maaløe, *Biological Regulation and Development*, Plenum, 1979.
- 529 [MacDonald and Gibbs, 1969] C.T. MacDonald and J.H. Gibbs, "Concerning the kinetics of polypeptide synthesis  
530 on polyribosomes," *Biopolymers*, 7, 1969.
- 531 [MacDonald *et al.*, 1968] C.T. MacDonald, J.H. Gibbs, and A.C. Pipkin, "Kinetics of biopolymerization on nucleic  
532 acid templates," *Biopolymers*, 6, 1968.
- 533 [Milo and Phillips, 2016] R. Milo and R. Phillips, *Cell biology by the numbers*, Garland Science, 2016.
- 534 [Milon *et al.*, 2006] P. Milon *et al.*, "The nucleotide-binding site of bacterial translation initiation factor 2 (IF2) as a  
535 metabolic sensor," *Proc. Nat. Acad. Sci. USA*, 103, 2006.
- 536 [Milon *et al.*, 2012] P. Milon *et al.*, "Real-time assembly landscape of bacterial 30S translation initiation complex,"  
537 *Nat. Struct. Mol. Biol.*, 19(6), 2012.
- 538 [Mitarai *et al.*, 2008] N. Mitarai, K. Sneppen, and S. Pedersen, "Ribosome Collisions and Translation Efficiency:  
539 Optimization by Codon Usage and mRNA Destabilization," *J. Mol. Biol.*, 382, 2008.
- 540 [Mitosch and Bollenbach, 2014] K. Mitosch and T. Bollenbach, "Bacterial responses to antibiotics and their combi-  
541 nations," *Environ. Microbiol. Rep.*, 6:545, 2014.
- 542 [Mitosch *et al.*, 2017] K. Mitosch, G. Rieckh, and T. Bollenbach, "Noisy Response to Antibiotic Stress Predicts  
543 Subsequent Single-Cell Survival in an Acidic Environment," *Cell Syst*, 4, 2017.
- 544 [Rand, 1971] W.M. Rand, "Objective Criteria for the Evaluation of Clustering Methods," *J Am Stat Assoc.*, 66(336),  
545 1971.
- 546 [Rodnina, 2018] M.V. Rodnina, "Translation in Prokaryotes," *Cold Spring Harb Perspect Biol.*, 10(9), 2018.
- 547 [Russ and Kishony, 2018] D. Russ and R. Kishony, "Additivity of inhibitory effects in multidrug combinations," *Nat.*  
548 *Microbiol.*, 3, 2018.
- 549 [Sanz-Garcia *et al.*, 2018] F. Sanz-Garcia, S. Hernando-Amado, and J.L. Martinez, "*Pseudomonas aeruginosa*  
550 Resistance to Ribosome-Targeting Antibiotics," *Front. Genet.*, 9, 2018.
- 551 [Savelsbergh *et al.*, 2009] A. Savelsbergh, M.V. Rodnina, and W. Wintermeyer, "Distinct functions of elongation  
552 factor G in translocation and ribosome recycling," *RNA*, 15, 2009.
- 553 [Schlunzen *et al.*, 2006] F. Schlunzen *et al.*, "The antibiotic kasugamycin mimics mRNA nucleotides to destabi-  
554 lize tRNA binding and inhibit canonical translation initiation," *Nat. Struct. Mol. Biol.*, 13(10), 2006.

- 555 [Scott *et al.*, 2010] M. Scott, C.W. Gunderson, E.M. Mateescu, Z. Zhang, and T. Hwa, “Interdependence of Cell  
556 Growth and Gene Expression: Origins and Consequences,” *Science*, 330:1099, 2010.
- 557 [Scott *et al.*, 2014] M. Scott, S. Klumpp, E.M. Mateescu, and T. Hwa, “Emergence of robust growth laws from  
558 optimal regulation of ribosome synthesis,” *Mol. Syst. Biol.*, 10:747–761, 2014.
- 559 [Segre *et al.*, 2005] D. Segre, A. DeLuna, G.M. Church, and R. Kishony, “Modular epistasis in yeast metabolism,”  
560 *Nat. Genet.*, 37(1), 2005.
- 561 [Shaw *et al.*, 2003] L.B. Shaw, R.K.P. Zia, and K.H. Lee, “Totally asymmetric exclusion process with extended  
562 objects: A model for protein synthesis,” *Phys. Rev. E*, 68, 2003.
- 563 [Simms *et al.*, 2019] C.L. Simms, L.L. Yan, J.K. Qiu, and H.S. Zaher, “Ribosome Collisions Result in +1 Frameshift-  
564 ing in the Absence of No-Go Decay,” *Cell Rep.*, 28, 2019.
- 565 [Stanley *et al.*, 2010] R.E. Stanley, G. Blaha, R.L. Grodzicki, M.D. Strickler, and T.A. Steitz, “The structures of the  
566 anti-tuberculosis antibiotics viomycin and capreomycin bound to the 70S ribosome,” *Nat. Struct. Mol. Biol.*, 17(3),  
567 2010.
- 568 [Stokes *et al.*, 2014] J.M. Stokes *et al.*, “Discovery of a small molecule that inhibits bacterial ribosome biogenesis,”  
569 *eLife*, 3:e03574, 2014.
- 570 [Tong *et al.*, 2004] A.M.Y. Tong *et al.*, “Global Mapping of the Yeast Genetic Interaction Network,” *Science*, 303,  
571 2004.
- 572 [Tritton, 1977] T.R. Tritton, “Ribosome-Tetracycline Interactions,” *Biochemistry*, 16(18), 1977.
- 573 [Walsh, 2003] C. Walsh, *Antibiotics: actions, origins, resistance*, ASM Press, Washington DC, 2003.
- 574 [Wilson, 2014] D.N. Wilson, “Ribosome-targeting antibiotics and mechanisms of bacterial resistance,” *Nature Rev.*  
575 *Microbiol.*, 12:35, 2014.
- 576 [Wood *et al.*, 2012] K. Wood, S. Nishida, E.D. Sontag, and P. Cluzel, “Mechanism-independent method for predict-  
577 ing response to multidrug combinations in bacteria,” *Proc. Nat. Acad. Sci. USA*, 109(30):12254, 2012.
- 578 [Yeh *et al.*, 2006] P. Yeh, A.I. Tschumi, and R. Kishony, “Functional classification of drugs by properties of their  
579 pairwise interactions,” *Nat. Genet.*, 38:489, 2006.
- 580 [Yeh *et al.*, 2009] P.J. Yeh, M.J. Hegreness, A. Presser Aiden, and R. Kishony, “Drug interactions and the evolution  
581 of antibiotic resistance,” *Nat. Rev. Microbiol.*, 7, 2009.
- 582 [Yu *et al.*, 2009] H. Yu, Y.-L. Chan, and I.G. Wool, “The Identification of the Determinants of the Cyclic, Sequential  
583 Binding of Elongation Factors Tu and G to the Ribosome,” *J. Mol. Biol.*, 386, 2009.
- 584 [Zaman *et al.*, 2007] S. Zaman, M. Fitzpatrick, L. Lindahl, and J. Zengel, “Novel mutations in ribosomal proteins  
585 L4 and L22 that confer erythromycin resistance in *Escherichia coli*,” *Mol. Microbiol.*, 66, 2007.
- 586 [Zia *et al.*, 2011] R.K.P. Zia, J.J. Dong, and B. Schmittmann, “Modeling Translation in Protein Synthesis with  
587 TASEP: A Tutorial and Recent Developments,” *J Stat Phys*, 144, 2011.
- 588 [Zimmer *et al.*, 2016] A. Zimmer, I. Katzir, E. Dekel, A.E. Mayo, and U. Alon, “Prediction of multidimensional drug  
589 dose responses based on measurements of drug pairs,” *Proc. Nat. Acad. Sci. USA*, 113, 2016.

## 590 7 Material and Methods

### 591 Bacterial strains

592 *Escherichia coli* K-12 MG1655 strain was used as wild-type (WT) strain. When necessary, selec-  
593 tion on kanamycin was performed at 25  $\mu\text{g}/\text{mL}$  (for post-recombineering selection, see below) or at  
594 50  $\mu\text{g}/\text{mL}$  (for P1 transduction and plasmid selection). A concentration of 100  $\mu\text{g}/\text{mL}$  was used for  
595 ampicillin (pCP20, resistance cassette resolution) and spectinomycin (pSIM19, recombineering).

596 To measure the bioluminescence time traces, pCS- $\lambda$  encoding the bacterial *luxCDABE* operon  
597 driven by the constitutive  $\lambda$ -P<sub>R</sub> promoter was transformed into the strains of interest [Kishony and  
598 Leibler, 2003]. Selection for the luminescence plasmid was used during the preparation of glycerol  
599 stocks (kanamycin 50  $\mu\text{g}/\text{mL}$ ) but was omitted during the measurements to avoid unknown chemical in-  
600 teractions between used antibiotics. The plasmid was stably maintained as we observed no significant  
601 fitness deficit due to pCS- $\lambda$  and no apparent spontaneous loss of the plasmid.

602 The translation factor titration platform was established in a strain HG105 (MG1655  $\Delta lacIZYA$ ) [Gar-  
603 cia *et al.*, 2011]. Briefly, endogenous genes encoding for translation factors were first sub-cloned into  
604 pKD13 vector under the control of P<sub>LacO-1</sub> promoter with FRT-flanked kanamycin resistance cassette  
605 (kan<sup>R</sup>) and *rrnB* terminator *TrrnB* upstream and downstream of the gene, respectively [Datsenko and  
606 Wanner, 2000; Klumpp *et al.*, 2009; Scott *et al.*, 2010; Lutz and Bujard, 1997]. The tandem of kan<sup>R</sup>  
607 and a gene with all regulatory elements was integrated into the chromosome (*galK* locus) using  $\lambda$ -red  
608 recombineering (plasmid pSIM19 [Datta *et al.*, 2006]). The kanamycin resistance cassettes here and in  
609 the following steps were resolved using yeast FLP resolvase expressed from pCP20 [Cherepanov and  
610 Wackernagel, 1995]. Loss of the resistance cassette and curing of the pCP20 plasmid were checked  
611 by streaking on selection agar plates with antibiotics and by junction PCR (for resolution). Following the  
612 resolution of kan<sup>R</sup>, the endogenous factor was inactivated by in-frame deletion: kan<sup>R</sup> was integrated  
613 into the gene locus and then resolved, which left a 34 aa-residue peptide [Datsenko and Wanner,  
614 2000]. We were unable to introduce kan<sup>R</sup> directly into the strain with P<sub>LacO-1</sub> driven *frr*; therefore,  
615 we first performed the deletion in an auxiliary strain MG1655  $\Delta frr::kan^R$  bearing the ASKA plasmid  
616 with *frr* [Kitagawa *et al.*, 2005] [JW0167(-GFP)], which complemented the chromosomal deletion when  
617 IPTG was added. Deletion was possible in the auxiliary strain. We then moved the deletion by gen-  
618 eralized P1 transduction [Lennox, 1955]. For *tufAB*, we P1-transduced the deletions ( $\Delta tufA::kan^R$  and  
619  $\Delta tufB::kan^R$ ) sequentially from the respective gene deletion strains from the KEIO collection [Baba  
620 *et al.*, 2006]. All other deletions were performed directly in the strains of interest using  $\lambda$ -red recombi-  
621 neering using pKD13 as a template for the cassette amplification [Datsenko and Wanner, 2000]. In the  
622 last step, *lacI* driven by the P<sub>LacO-1</sub> promoter (yielding a growth-rate independent negative autoregula-  
623 tion [Klumpp *et al.*, 2009; Scott *et al.*, 2010]) together with the FRT-flanked kan<sup>R</sup> was integrated into *intS*  
624 locus and the resistance cassette was resolved. The allele  $\Delta intS::kan^R$ -P<sub>LacO-1</sub>-*lacI*-*TrrnB* was moved  
625 into the strains by generalized P1 transduction. All chromosomal modifications were validated by PCR.  
626 The factor titration platform and the repressor operon were Sanger-sequenced at the integration junc-

627 tions using PCR primers or a primer binding into the  $\text{kan}^R$  promoter region (which is upstream of the  
628  $P_{\text{LacO}-1}$  promoter prior the resolution). The final genotype for the strains bearing the factor titration  
629 platforms is  $\text{HG105 } \Delta\text{galk}::\text{frt-}P_{\text{LacO}-1}\text{-}x \Delta\text{x}::\text{frt } \Delta\text{intS}::\text{frt-}P_{\text{LacO}-1}\text{-}lacI$ , where  $x$  denotes the chosen  
630 factor. These strains contained no plasmids and no antibiotic resistance cassettes but had a single  
631 copy of a translation factor under inducible control.

632 To generate the strain with independently regulated initiation and translocation factors, we started  
633 with a strain carrying a single *infB* copy driven by  $P_{\text{LacO}-1}$ . Then, the negatively autoregulated *tetR*  
634 repressor was integrated into the chromosome, followed by FLP resolvase-mediated resolution of the  
635 selection marker. This enabled the integration of  $P_{\text{LtetO}-1}$ -driven *fusA* into the *intS* locus; resolution was  
636 followed by the disruption of the endogenous copy of *fusA*. Furthermore, we introduced a negatively  
637 auto-regulated *lacI* into the *xyiB* locus. This yielded a marker-less strain with the two essential genes  
638 *infB* and *fusA* under inducible, negatively autoregulated and independent control. The final genotype is:  
639  $\text{HG105 } \Delta\text{galk}::\text{frt-}P_{\text{LacO}-1}\text{-}infB \Delta\text{infB}::\text{frt } \Delta\text{ycaCD}::\text{frt-}P_{\text{LtetO}-1}\text{-}tetR \Delta\text{intS}::\text{frt-}P_{\text{LtetO}-1}\text{-}fusA \Delta\text{fusA}::\text{frt}$   
640  $\Delta\text{xyiB}::\text{frt-}P_{\text{LacO}-1}\text{-}lacI$ . Oligonucleotide sequences, targeted template, restrictions sites (when used)  
641 and brief description of use are in Supplementary Table S2. All DNA modifying enzymes and Q5  
642 polymerase used in PCR were from New England Biolabs.

## 643 **Growth rate assay and two-dimensional concentration matrices**

644 Rich lysogeny broth (LB) medium, which at 37°C supports a growth rate of  $2.0 \pm 0.1 \text{ h}^{-1}$ , was used.  
645 LB medium was prepared from Sigma Aldrich LB broth powder (L3022), pH-adjusted by adding NaOH  
646 or HCl to 7.0 and autoclaved. Antibiotic stock solutions were prepared from powder stocks (for catalog  
647 numbers, see Table S1), dissolved either in ethanol (CHL, ERM and TET), DMSO (LAM and TMP) or  
648 water (KAN, CRY, LCY, KSG, FUS and STR), 0.22  $\mu\text{m}$  filter sterilized and kept at -20°C in the dark until  
649 used. Antibiotics were purchased from Sigma Aldrich or AvaChem. A previously established growth-  
650 rate assay based on photon counting was used to precisely quantify the absolute growth rates over  
651 the course of 5-9 generations [Kishony and Leibler, 2003]. Cultures were grown in 150  $\mu\text{L}$  of media  
652 in white 96-well microtiter plates (Nunc 236105), which were tightly sealed by transparent adhesive  
653 foils (Perkin-Elmer 6050185 TopSeal-A PLUS) to prevent contamination and evaporation. We prepared  
654 glycerol stocks of WT and factor-titration platform strains from saturated overnight cultures. We inocu-  
655 lated the cultures with  $\sim 10^2$  cells per well (1:10<sup>6</sup> dilution) from either thawed glycerol stocks (for the  
656 drug interaction network) or from liquid cultures in which we first incubated the bacteria containing the  
657 factor titration-platform for 1 h in the absence of IPTG (inoculated by 1:2000 dilution of the glycerol  
658 stock) to partially dilute out the remaining factor molecules before additional 1:1000 dilution into mea-  
659 surement plates. Between 10-20 plates were cycled through a plate reader using a stacking system  
660 (Tecan M1000). We built a custom incubator box around the stacker towers to facilitate ventilation and  
661 fix the temperature to 37°C. This incubator was designed and troubleshot by BK and Andreas Anger-  
662 mayr (IST Austria and University of Cologne) and built by IST Miba Machine Shop. Each plate was  
663 read every 20-40 min and was shaken (orbital 10 s, 582 rpm) immediately before reading (settle time



664 10 ms, integration time 1 s). Plates were manually pipetted and concentration gradients of antibiotics  
665 and IPTG were prepared by serial dilution (0.70-fold). Growth rates were determined as a best-fit slope  
666 of a linear function fitted to the log-transformed photon counts per second. The detailed fitting procedure  
667 and examples of growth curves are shown in Fig. S1. The experimental and analysis procedure led to  
668 reproducible measurements of growth rates between days (Fig. S1,  $\rho \approx 0.86$ ). Two-dimensional gradi-  
669 ents were usually set up in a  $12 \times 16$  matrix (across two 96-well plates). For the double factor titration  
670 experiment the inducer gradients were set up across 6 plates to form a  $24 \times 24$  grid.

## 671 Normalization of dose-response surfaces

672 All growth rates were normalized with respect to the average growth rate in drug-free medium [for  
673 factor-titration strains at highest inducer concentration (5 mM)]. Small differences between individual  
674 dose-response curves were inevitable due to challenges at preparing identical concentrations gradients  
675 on different days. To correct for such day-to-day variability, we rescaled the concentration units to the  
676  $IC_{50}$  for each drug. The  $IC_{50}$  was obtained from fitting the Hill function  $y(x) = 1 / [1 + (x/IC_{50})^n]$  to  
677 the individual dose-response curves. The dose-response curve of each drug was measured seven  
678 times and averaged. The  $IC_{50}$  and corresponding errors reported in Table 1 are extracted from such  
679 average dose-response curves. Induction curves were normalized slightly differently, using a shifted  
680 and increasing Hill function in the form  $g(in) = [(in + in_0)/IC_{50}]^n / \{1 + [(in + in_0)/IC_{50}]^n\}$ , where  $in_0$  is a  
681 concentration offset. The latter parameter was required as the complete cessation of growth was not  
682 achievable in some cases even in the absence of inducer as the promoter  $P_{LlacO-1}$  is leaky. Inducer  
683 concentrations were thus rescaled via  $in \rightarrow (in + in_0)/IC_{50}$ .

## 684 Smoothing of dose-response surfaces

685 To reduce noise when plotting response-surfaces, we smoothed the data using a custom Mathematica  
686 script that implements locally weighted regression (LOESS) [Cleveland and Devlin, 1988]. This ap-  
687 proach only smoothed the contours and did not alter the character of dose-response surfaces. Smooth-  
688 ing was only used for plotting and not for the analysis in which only linear interpolations between points  
689 were used (Mathematica function `Interpolation`).

## 690 Quantification of the drug interaction type and bottleneck dependency

### 691 Loewe interaction score

692 To quantify the drug interaction between a pair of antibiotics, we defined the Loewe interaction score as

$$LI = \log \left( \frac{\int g(x_1, x_2) dx_1 dx_2}{\int g(x_1, x_2)_{\text{add}} dx_1 dx_2} \right), \quad (1)$$

693 where  $g(x_1, x_2)$  and  $g_{\text{add}}(x_1, x_2)$  are the measured and the predicted additive dose-response surfaces  
694 over a 2D concentration field  $(x_1, x_2)$ , respectively. The score  $LI$  is a log-transformed ratio of volumes

695 underneath the dose-response surfaces. It is positive for antagonistic and suppressive interactions, 0  
696 for perfectly additive, and negative for synergistic interactions. To avoid imposing arbitrary bounds for  
697 classifying a measured interaction as synergistic or antagonistic/suppressive (rather than additive), we  
698 performed smooth bootstrapping on a set of ideal additive response surfaces to establish a distribution of  
699 interaction indices expected for perfectly additive but noisy surfaces. To achieve this, we generated ad-  
700 ditive dose-response surfaces for drugs with Hill steepness parameter  $n$  between 1.8 and 6.6 (obtained  
701 as 10% and 90% percentiles of the steepnesses distribution for measured dose-response curves). We  
702 estimated the variabilities of measurements  $\sigma_V$  from data from eight replicated dose-response curves  
703 with seven replicates per data point and fitting errors  $\sigma_f$  from the slope of all growth rate fits. Both error  
704 and variability distributions were well described by log-normal distributions. For each point on the gener-  
705 ated surfaces, we added Gaussian noise with standard deviation given as  $\sqrt{\sigma_V^2 + \sigma_f^2}$ , where both  $\sigma_V$  and  
706  $\sigma_f$  were drawn from respective log-normal distributions. We calculated  $LI$  score for 2000 response sur-  
707 faces and obtained the distribution shown in Fig. S1D. We determined boundaries separating synergistic  
708 and antagonistic  $LI$  scores ( $b_{lower}$  and  $b_{upper}$ , respectively) from additive interval as Bonferroni-corrected  
709 percentiles (for 5%/28  $\approx$  0.18% and 99.82%) of the bootstrapped distribution Fig. S1D). Mean  $LI$  scores  
710 for measured response surfaces falling outside of the interval with these boundaries were classified as  
711 synergistic or antagonistic; otherwise, the interaction was classified as additive.

## 712 **Bottleneck dependency score**

713 Similar to  $LI$ , the bottleneck dependency score  $BD$  is an integrative quantity that concisely reports on  
714 the response-averaged deviation from independence. To calculate this score, the antibiotic and inducer  
715 concentrations are first converted into corresponding responses using the induction- and antibiotic dose-  
716 response curves (Fig. S3). Mathematically, this means that  $r_x = y(c)$  and  $r_y = g(in)$  for antibiotic  
717 and inducer, respectively. In response space, the null-expectation is independence, *i.e.* the expected  
718 response is a product of individual responses. Thus, we define the  $BD$  score as

$$BD = \log \left( \frac{\int r(r_x, r_y) dr_x dr_y}{\int r_x r_y dr_x dr_y} \right). \quad (2)$$

719 This score is zero when the two perturbations (bottleneck and antibiotic) are independent; it is pos-  
720 itive or negative for alleviation and aggravation, respectively. As for the  $LI$  score, we evaluated the  
721 independence interval of  $BD$  scores by bootstrapping the  $BD$  score for independent surfaces at given  
722 induction and antibiotic dose-response curves. Evaluating the percentiles of such null-distributions gave  
723 the boundaries for evaluation of the type of deviation from independence (alleviation or aggravation).

## 724 **Growth law-based biophysical model**

725 **Single antibiotic** The mathematical model used for predicting bacterial growth in the presence of  
726 antibiotic combination is an extension of the model presented in Ref. [Greulich *et al.*, 2015]. In-depth  
727 analysis of the model will be presented elsewhere. In brief, the model captures the crucial processes of

728 antibiotic binding and transport as well as physiological constraints. We briefly summarize the results  
729 for a single antibiotic and its main ingredients. The growth laws are given as

$$r_U = \lambda/\kappa_t + r_{\min}, \quad (3)$$

730 and

$$r_{\text{tot}} = r_U + r_b = r_{\max} - \lambda \Delta r \left( \frac{1}{\lambda_0} - \frac{1}{\kappa_t \Delta r} \right), \quad (4)$$

where  $r_U$ ,  $r_b$  and  $r_{\text{tot}}$  are concentrations of unbound, bound and total ribosomes. The constants  $\kappa_t = 0.06 \mu\text{M}^{-1}\text{h}^{-1}$ ,  $r_{\min} = 19.3 \mu\text{M}$ ,  $r_{\max} = 65.8 \mu\text{M}$  and  $\Delta r = r_{\max} - r_{\min} = 46.5 \mu\text{M}$  were experimentally determined in Refs. [Scott *et al.*, 2010; Greulich *et al.*, 2015]. Transport of antibiotic is captured by the average flux as  $J(a_{\text{ex}}, a) = p_{\text{in}} a_{\text{ex}} - p_{\text{out}} a$ , where  $p_{\text{in}}$  and  $p_{\text{out}}$  are influx and efflux rates, respectively, and  $a$  and  $a_{\text{ex}}$  are the intracellular and external antibiotic concentration, respectively. The kinetics of binding of the antibiotic to the ribosome is given as  $f(r_U, r_b, a) = -k_{\text{on}} a (r_U - r_{\min}) + k_{\text{off}} r_b$ , where  $k_{\text{on}}$  and  $k_{\text{off}}$  are binding and unbinding rates, respectively, and  $K_D = k_{\text{off}}/k_{\text{on}}$ . The fraction of inactive ribosomes  $r_{\min}$  is assumed not to bind antibiotics [Greulich *et al.*, 2015]. The following system of ordinary differential equations (ODEs) describes the kinetics of the system

$$\frac{da}{dt} = -\lambda a + f(r_U, r_b, a) + J(a_{\text{ex}}, a), \quad (5a)$$

$$\frac{dr_U}{dt} = -\lambda r_U + f(r_U, r_b, a) + s(\lambda), \quad (5b)$$

$$\frac{dr_b}{dt} = -\lambda r_b - f(r_U, r_b, a). \quad (5c)$$

731 In Eqs. (5) the terms  $-\lambda X$  (with  $X = a, r_b, r_{\text{tot}}$ ) describe effective dilution due to growth and  $s(\lambda) = \lambda r_{\text{tot}}$  is  
732 the ribosome synthesis rate. In balanced exponential growth all time derivatives in Eqs. (5) vanish and  
733 the steady-state solution reads

$$\left( \frac{\lambda}{\lambda_0} \right)^3 - \left( \frac{\lambda}{\lambda_0} \right)^2 + \left( \frac{\lambda}{\lambda_0} \right) \left[ \frac{1}{4} \left( \frac{\lambda_0^*}{\lambda_0} \right)^2 + \frac{a_{\text{ex}}}{2\text{IC}_{50}^*} \left( \frac{\lambda_0^*}{\lambda_0} \right) \right] - \frac{1}{4} \left( \frac{\lambda_0^*}{\lambda_0} \right)^2 = 0, \quad (6)$$

734 where  $\lambda_0^* = 2\sqrt{p_{\text{out}}\kappa_t K_D}$  and  $\text{IC}_{50}^* = \Delta r \lambda_0^*/(2p_{\text{in}})$ . This equation can be recast into

$$c = \frac{1}{\alpha^2 + 1} \left( \frac{\alpha^2}{y} - \alpha^2 + 4y - 4y^2 \right), \quad (7)$$

where

$$c = a_{\text{ex}}/\text{IC}_{50}, \quad (8a)$$

$$y = \lambda/\lambda_0, \quad (8b)$$

$$\alpha = \lambda_0^*/\lambda_0. \quad (8c)$$

735 Here,  $\text{IC}_{50}$  is the concentration required to halve the growth rate (compared to zero drug) and we took  
736 into account that  $\text{IC}_{50}/\text{IC}_{50}^* = (\alpha^2 + 1)/2\alpha$ . Importantly, the dependence of the relative growth rate  $y$  on  
737 the relative concentration  $c$  dramatically changes when  $\alpha < \alpha_{\text{crit}} = 2/3\sqrt{3} \approx 0.385$ , as Eq. (7) exhibits a  
738 concentration interval in which growth rate has two stable solutions.

**Pair of antibiotics** When a pair of antibiotics is considered, additional ODEs are added to describe the binding of individual antibiotics to ribosomes (first binding step) as well as the simultaneous binding of two antibiotics to the already bound ribosome (second binding step):

$$\frac{da_i}{dt} = -\lambda a_i + f_i(r_u, r_{b,i}, a_i) + \delta_{\text{off},i} k_{\text{off},i} r_b^{a_1, a_2} - \delta_{\text{on},i} k_{\text{on},i} a_i r_{b,\bar{i}} + J_i(a_{\text{ex},i}, a_i), \quad (9a)$$

$$\frac{dr_{b,i}}{dt} = -\lambda r_{b,i} - f_i(r_u, r_{b,i}, a_i) + \delta_{\text{off},\bar{i}} k_{\text{off},\bar{i}} r_b^{a_1, a_2} - \delta_{\text{on},\bar{i}} k_{\text{on},\bar{i}} a_{\bar{i}} r_{b,i}, \quad (9b)$$

$$\frac{dr_b^{a_1, a_2}}{dt} = -\lambda r_b^{a_1, a_2} + \sum_{i=A,B} \delta_{\text{on},i} k_{\text{on},i} a_i r_{b,\bar{i}} - \sum_{i=A,B} \delta_{\text{off},i} k_{\text{off},i} r_b^{a_1, a_2} \quad (9c)$$

$$\frac{dr_u}{dt} = -\lambda r_u + \sum_{i=A,B} f_i(r_u, r_{b,i}, a_i) + s(\lambda). \quad (9d)$$

739 In the system of Eqs. (9), the kinetic parameters and the transport flux and binding functions depend  
 740 on the antibiotic (indices  $i$ ). The additional terms  $\delta_{\text{off},i} k_{\text{off},i} r_b^{a_1, a_2}$  and  $\delta_{\text{on},i} k_{\text{on},i} a_i r_{b,\bar{i}}$  describe the rates of  
 741 detachment of the  $i$ -th antibiotic from double-bound ribosomes  $r_b^{a_1, a_2}$  and binding of the  $i$ -th antibiotic  
 742 to the ribosome already bound by the other antibiotic  $\bar{i}$ , respectively. The parameter  $\delta_{j,i}$  determines  
 743 the relative changes in rate constants when the other antibiotic is bound. Here, we investigated two  
 744 cases: independent binding of the two antibiotics, *i.e.*,  $\delta_{j,i} = 1$  and competition  $\delta_{j,i} = 0$ , where binding of  
 745 either antibiotic excludes binding of the other one. The effects of different values of  $\delta_{j,i}$  will be presented  
 746 elsewhere.

747 We obtained the steady state solution of Eqs. (9) numerically by forward time integration (Mathe-  
 748 matica function `NDSolve`). While forward integration requires explicit values of kinetic constants  $k_{\text{on}}$  and  
 749  $K_D$ , the steady state solutions are largely independent of the exact parameter values as long as the pa-  
 750 rameter ratios  $\alpha$  and  $\text{IC}_{50}^*$  are the same and  $k_{\text{on}} \gg \kappa_t$ . Upon fitting  $\alpha$  to the normalized dose-response  
 751 curves, we fixed  $k_{\text{on}} = 100 \mu\text{M}^{-1} \text{h}^{-1}$  (which gave consistent results for all dose-response curves). For  
 752 each dose-response curve, we determined the optimized value of  $K_D$  – this was required due to explicit  
 753 need of parameters in forward integration (Fig. S2). By constraining these parameters, we can calculate  
 754 the steady state solutions of Eqs. (9).

## 755 Clustering of bottleneck-dependency vectors

756 We performed clustering of BD vectors projected on a space of lower dimensionality. For dimensionality  
 757 reduction, we used Principal Component Analysis (PCA). We used the first three principal components  
 758 which explained  $\eta_r \approx 95.38\%$  of variance. In this projected three-dimensional space, we performed  
 759 unsupervised agglomerative clustering (Mathematica function `FindClusters`) with cosine distance as a  
 760 measure of cluster cohesion.

761 We estimated the p-value of the observed clustering by bootstrapping. We used the Rand index ( $RI$ )  
 762 [Rand, 1971] as a criterion for evaluating the difference between clustering results. For example, if  $w$   
 763 is the clustering obtained for the reshuffled sample and clustering  $w'$  is obtained for PCA projection of

764 median bottleneck dependency vectors (shown in Figs. 3,S3), then the Rand index is

$$RI(w, w') = \frac{\sum_{i < j}^N \psi_{ij}}{N(N-1)/2} \in [0, 1]. \quad (10)$$

765 Here,  $\psi_{ij}$  is 1 if the  $i$ -th and  $j$ -th data points are either inside or outside of the same cluster and zero  
766 otherwise; the denominator is the total number of unique pairs between  $N$  elements. We generated  $10^4$   
767 reshuffled datasets, evaluated  $RI$  for each dataset and calculated the cumulative distribution function.  
768 We evaluated an empirical p-value as

$$p = 1 - \text{CDF} \left( 1 - \frac{1}{N(N-1)/2} \right) \approx 3 \times 10^{-4}, \quad (11)$$

769 which is an estimate of the probability for obtaining the observed clustering of median BD vectors by  
770 chance. The cluster areas shown in Fig. 3 were obtained by smooth bootstrapping of median BD  
771 vectors for a given noise statistics, PCA projection and subsequent calculation of the minimal convex  
772 hull (Mathematica function `ConvexHullMesh`). The additional response vectors for LAM, TMP and NIT  
773 were PCA projected (using Mathematica function `DimensionReduction` obtained for the median values  
774 of BD vectors). Note, that the plots in Fig. 3E show projections onto PC1,2 but clustering was performed  
775 on first three principal components (Fig. S3).

## 776 Remapping

777 Our remapping procedure converts inducer concentrations  $in$  into the concentrations  $c$  of an idealized  
778 antibiotic that precisely targets the translation step controlled by the titrated factor. This requires an  
779 induction curve and a dose-response curve: The former is described by an increasing Hill function  $g(in)$ ,  
780 and the latter by solving Eq. (7) for  $y$ . The conversion between concentrations is formally described  
781 as  $c = y^{-1}(g(in))$  at a given  $\alpha$ , which can be arbitrarily chosen for the idealized antibiotic. When  
782  $\alpha < \alpha_{\text{crit}}$ , the dose-response curve is bistable and has a region in which more than one response  
783 will yield the same concentration – in these cases we consider only the concentration corresponding  
784 to the highest stable growth rate as the other solutions are either unstable or will be outcompeted.  
785 Further, higher inducer concentrations are remapped to lower antibiotic concentrations and an infinite  
786 inducer concentration corresponds zero antibiotic concentration. As this is impractical, we considered  
787 all mimicked concentrations (normalized with respect to  $IC_{50}$ ) that are below 0.1 as equivalent to 0.

## 788 Regularization of surfaces

789 Strains containing the factor titration platform have mostly very similar antibiotic dose-response curves  
790 as the wild-type at maximal inducer concentrations. However, to correct for small deviations, we  
791 rescaled the antibiotic concentrations on the antibiotic-inducer grid. The shape of this transformation  
792 is derived from equating the responses of two Hill functions with different steepnesses. Consider two  
793 Hill functions with Hill exponents  $n_{WT}$  and  $n_t$  for WT and factor-titrating strain, respectively. Then, by

794 equating the responses captured by these Hill functions, we calculated the rescaled relative (with  
795 spect to  $IC_{50}$ ) antibiotic concentrations as  $c_{a,t} = c_{a,WT}^{n_t/n_{WT}}$ . We refer to this conversion as the “power-law  
796 transform”. Such regularized surface was then used in remapping.

### 797 **Remapping-based equivalence**

798 Factor deprivation is equivalent to the action of a specific antibiotic if both perturbations can substitute for  
799 each other. Upon remapping the inducer concentration, the response surface for an equivalent inducer-  
800 antibiotic pair is transformed into an additive response surface. To determine if the deprivation of a  
801 specific factor is equivalent to the action of a specific antibiotic, we performed the remapping in tandem  
802 with bootstrapping. Bootstrapping assesses the effects of uncertainties in the remapping parameter  
803  $\alpha$  (obtained from a fit to a drug dose-response curve), artifacts of the response surface over inducer-  
804 antibiotic grid and sampling, and inherent noisiness of growth rate determination. We first restricted  
805 the dataset to data points with relative growth equal to 0 or above 0.1 with growth rate coefficient of  
806 determination  $R^2 > 0.8$ . In each round of bootstrapping, the following steps are carried out:

- 807 ○ drawing of a remapping parameter  $\alpha$  from a normal distribution, centered at the best-fit-value and  
808 with standard deviation estimated from fitting, and remapping,
- 809 ○ drawing of a random sample from remapped data points that is of random size (between 75% and  
810 100% of the data set),
- 811 ○ addition of Gaussian noise to the growth rates (estimated from the growth rate fit),
- 812 ○ calculation of the ideal additive surface at a given  $\alpha$  for comparison, and
- 813 ○ calculation of  $LI$  score.

814 This procedure was repeated 100 times for each bottleneck-antibiotic pair and yielded a set of distri-  
815 butions. Each  $LI$  distribution was then statistically evaluated for being inside the additive interval. We  
816 obtained the cumulative distribution function (CDF) for each distribution and we calculated its value on  
817 both ends of additive interval (Fig. S1). If either  $1 - CDF(b_{lower})$  or  $CDF(b_{upper})$  is below  $p = 0.05$ , the  
818 pair is considered inequivalent – this is the case in which the remapped surface is unlikely to be additive.  
819 For each antibiotic, more than one of the bottlenecks could be statistically equivalent – we thus deemed  
820 the bottleneck-antibiotic pair with the highest correlation between average remapped and ideal additive  
821 growth rates to be the primary candidate for equivalence of perturbations.

### 822 **Quantitative comparison of predicted and measured response surfaces**

823 Both measured and predicted surfaces match along the individual concentration axes, as those were  
824 obtained from the fits of dose-response curves. Thus, points corresponding to such measurements are  
825 always a good match and in turn increase Pearson correlation invariantly of a potential mismatch in  
826 surface segments further away from individual axes. We thus sought an applicable metric that would  
827 identify systematic deviations from predicted isoboles.

828 We developed an “isobole sliding” method in which we determine a mean deviation of points close  
829 to some predicted growth rate from measured values. It provides a concise quantitative description of

830 differences between predicted and measured isoboles and identifies the most discrepant areas of the  
831 surfaces. For that we systematically move along the (ordered) predicted growth values  $g_i$  and select  
832  $S = 20$  consecutive points and average their deviations from measured values of growth rate  $h_i$ . This  
833 yields a deviation trajectory  $t(\hat{g})$  of a mean deviation as a function of average predicted growth rate

$$t(\hat{g}) = \frac{1}{S} \sum_{i=j}^{j+S-1} (h_i - g_i), \quad \text{where } g_i < g_{i+1} \quad \text{and} \quad \hat{g} = \frac{1}{S} \sum_{i=j}^{j+S-1} g_i. \quad (12)$$

834 Keeping the number of points  $S$  in the window fixed allows the comparison between different subsets of  
835 the data.

836 To assess the probability of observing such deviation by chance, we created a benchmark dataset by  
837 replacing all measured values with predicted ones to which we added Gaussian noise (estimated from  
838 bootstrapped dispersion, but of at least 0.05 relative growth units). For each bootstrapped realization  
839 (obtained either by remapping or the biophysical model), we randomly drew a subset of random size  
840 (between 75% and 100% of the data set) to estimate the robustness of the prediction with respect  
841 to a low number of outliers. We collapsed each isobole sliding trajectory into a single number ( $s$ )  
842 by calculating an maximal deviation,  $s = \max_{\hat{g}} |t(\hat{g})|$ , thus yielding a distribution of  $s$  values for both  
843 measured and benchmark trajectory maxima.

844 Ideally, the distribution of maximal average deviations should either overlap or be below the bench-  
845 mark distribution. To assess the statistical deviation, we evaluated the CDF of predicted-measured  
846 distribution at the 95-percentile of the benchmark distribution. If the value was below 0.05, we rejected  
847 the prediction. This method requires that there are no systematic deviations over the whole surface,  
848 thus yielding a very stringent criterion for considering a match between two surfaces. Thus, even if two  
849 surfaces match qualitatively, isobole sliding might still return a statistically significant mismatch.

850 To estimate the upper bound of prediction-measurement consistency, we checked for consistency  
851 of the measured replicates. For this we considered one of the replicates as a prediction of the other.  
852 Doing so, we observed that twenty-one out of twenty-eight (75%) surfaces act as statistically significant  
853 predictions for one another. This serves as an approximate upper bound for how many predictions-  
854 measured pairs can be at most expected to match at the given experimental variability.

## 855 **Assessment of predictive power**

856 At this point we can assess the consistency of predictions. Using the method described above, we eval-  
857 uated both independent and competitive binding schemes for their congruence with measured surfaces.  
858 The scheme that led to the distribution with the smallest mean maximal deviation, was considered as  
859 best-match. However, both schemes can yield a good match – by asking how many of the schemes  
860 yield a match in both replicates, we obtain an estimate for a fraction of correct predictions (Fig. S2). By  
861 counting in how many cases at least one of the schemes yields a match between replicates, we find  
862 that sixteen out of twenty-eight interactions can be accounted for by a biophysical model.

863 Applying isobole sliding to the prediction of remapping shows that even small quantitative deviations  
864 will lead to discarding of the prediction (Fig. S5). However, counting additionally explained interactions

865 by remapping (TET-CRY, TET-FUS, KSG-CHL, CRY-KSG) increases the total tally of explained interac-  
 866 tions to twenty out of twenty-eight ( $\approx 71.4\%$ ), which is below the estimated self-consistency bound of  
 867 75%. As discussed above, qualitative matches are not included in this metric.

## 868 TASEP model of translation within growth law framework

869 There are several specific differences between the classical open TASEP system and translation in the  
 870 context of the bacterial cell. Firstly, the pool of ribosomes is finite and variable in size (as dictated by the  
 871 growth laws). Secondly, the ribosomes span over more than one site – it occupies  $L \approx 16$  codons [Kang  
 872 and Cantor, 1985]. Thirdly, steps in translation are mediated by translation factors that bind to the  
 873 ribosome in a specific state and (stochastically) push the ribosome into another state. The rates depend  
 874 on the abundance of ribosomes in a specific state and the abundance of the factor catalyzing the  
 875 step. Thus, the rates, which are kept fixed in the classical TASEP, become variable and system-state  
 876 dependent.

## 877 Mathematical framework

878 **Analytical results for TASEP of extended particles** In the absence of ribosome pausing, estab-  
 879 lished analytical results for the TASEP of extended particles can be used [Klumpp and Hwa, 2008;  
 880 Lakatos and Chou, 2003; Shaw *et al.*, 2003; Zia *et al.*, 2011]. If the release of ribosomes at the end  
 881 of the transcript is not limiting, two different regimes of ribosome traffic exist, namely the initiation- and  
 882 translocation-limited regime. These regimes are separated by a non-equilibrium phase transition. The  
 883 current of ribosomes  $J$  in the two regimes is given by:

$$J_{\text{init}}(\zeta, \gamma) = \frac{\zeta(\gamma - \zeta)}{[\gamma + \zeta(L - 1)]} \quad \text{and} \quad J_{\text{tran}}(\zeta, \gamma) = \frac{\gamma}{(1 + \sqrt{L})^2}, \quad (13)$$

884 where  $\zeta$  and  $\gamma$  are initiation and translocation attempt-rates, respectively. The ribosome (coverage)  
 885 density  $\rho$  reads:

$$\rho_{\text{init}}(\zeta, \gamma) = \frac{L\zeta}{[\gamma + \zeta(L - 1)]} \quad \text{and} \quad \rho_{\text{tran}}(\zeta, \gamma) = \rho_{\text{max}} = \frac{1}{1 + 1/\sqrt{L}}. \quad (14)$$

886 The elongation velocity  $u$  depends both on the current and the ribosome density  $\rho_r = \rho/L$  via  $u = Js/\rho_r$ ,  
 887 where  $s$  is the step size (1 aa). This in turn yields

$$u_{\text{init}}(\zeta, \gamma) = s(\gamma - \zeta) \quad \text{and} \quad u_{\text{tran}}(\zeta, \gamma) = s \frac{\gamma}{1 + 1/\sqrt{L}}. \quad (15)$$

888 **Distribution of ribosomes across different classes** The total ribosome concentration  $r_{\text{tot}}$  is

$$r_{\text{tot}} = r_i + r_{\text{tr}} + r_{\text{min}}, \quad (16)$$

889 where  $r_i$  and  $r_{\text{tr}}$  are the concentrations of non-initiated and translating ribosomes, respectively. Trans-  
 890 lating ribosomes are distributed across numerous mRNA transcripts in the cell and their concentration



891 can be written as:

$$r_{tr} = \frac{1}{V} \sum_p^M \rho_{r,p} D_p = \frac{1}{V} \sum_p^M \frac{\rho_p}{L} D_p \approx \frac{1}{V} M \frac{\bar{\rho}}{L} \bar{D} = \Xi \rho_r \bar{D}, \quad (17)$$

892 where  $D_p$  and  $\rho_{r,p}$  are the length and ribosome density of the  $p$ -th transcript, respectively,  $M$  is the  
 893 total number of transcripts and  $V$  the cell volume ( $\Xi = M/V$  is the concentration of transcripts). The  
 894 density of ribosomes  $\rho_r = \rho/L$  is a TASEP-derived quantity and depends on the initiation attempt rate  
 895  $\alpha$  and translocation attempt rate  $\gamma$ . In the last step, we assumed for simplicity that the density of  
 896 ribosomes across the transcripts does not vary significantly between transcripts. However, if transcripts  
 897 do differ in their ribosomes densities, the ones with higher densities will enter the translocation limiting  
 898 regime (in which traffic jams form) already at a smaller decrease in translocation attempt rate. If those  
 899 transcripts code for essential genes, this will correspondingly lead to a decrease in growth rate already  
 900 at such smaller decreases in translocation attempt rate. Such traffic jams would still be relieved by  
 901 lowering initiation rate even though traffic jams have not developed on all other transcripts. Thus, the  
 902 qualitative conclusions of the analysis below would still hold, but the results would be quantitatively  
 903 different. However, taking differences between transcripts into account would require explicit modeling  
 904 of individual transcripts and is beyond the scope of this work. Assuming similar ribosomes densities  
 905 allows replacement of the sum with  $M\bar{D}$ , where  $\bar{D}$  is the average length of transcripts being translated;  
 906 the proteome-weighted average length is  $\bar{D} \approx 209$  [Milo and Phillips, 2016].

907 The growth rate is proportional to the elongation velocity of ribosomes along the transcript  $u(\alpha, \gamma)$   
 908 and to the number of translating ribosomes. However, there is a limit for the maximal elongation rate  
 909  $u_{max}$  because other processes (e.g., charged tRNA delivery) become limiting at some point in a given  
 910 nutrient environment. We estimated the maximal elongation rate from the Michaelis-Menten-like relation  
 911 between RNA/protein ( $R/P$ ) and translation rate obtained in Ref. [Dai *et al.*, 2016]:  $u = k_{el}(R/P)/[(R/P) +$   
 912  $K_{el}]$ , where  $k_{el} = 22$  aa/s and  $K_{el} = 0.11$ . We calculated the theoretical  $(R/P) = (R/P)_{min} + \lambda_0/\kappa_t^{R/P} \approx$   
 913  $0.54$ , where  $\kappa_t^{R/P} = 4.5$  h<sup>-1</sup> and  $(R/P)_{min} = 0.09$  [Scott *et al.*, 2010]. Plugging this  $(R/P)$  into the  
 914 Michaelis-Menten function for the translation rate, we obtain  $u_{max} \approx 18$  aa/s. Thus, the growth rate is  
 915 given as

$$\lambda = \kappa_t r_{tr} \min \left[ \frac{u(\zeta, \gamma)}{u_{max}}, 1 \right]. \quad (18)$$

916 However, the growth rate feeds back into the total ribosome concentration via the growth law as

$$r_{tot} = r_i + r_{tr} + r_{min} = r_{max} - \lambda \Delta r \left( \frac{1}{\lambda_0} - \frac{1}{\kappa_t \Delta r} \right). \quad (19)$$

917 We can estimate  $\Xi$  at  $\lambda_0$  as

$$\frac{\lambda_0}{\kappa_t} = \Xi \rho_r \bar{D} \implies \Xi = \frac{\lambda_0}{\kappa_t \rho_r \bar{D}}. \quad (20)$$

**Factor-dependent translocation attempt rate** The ribosome will perform a specific step only when  
 the associated factor is bound to it: the step-attempt rate is proportional to the probability  $P_b$  of the  
 ribosome being bound by a factor. This probability can be calculated by assuming a population of  
 elongation factors with concentration  $c_{ef} = c_{ef,b} + c_{ef,n}$  and translating ribosomes  $r_{tr} = r_{tr,b} + r_{tr,n}$ , where

the indices  $b$  and  $n$  denote the factor-bound and unbound subpopulations, respectively. Binding is described by

$$\frac{dr_{tr,b}}{dt} = k_{on}c_{ef,n}r_{tr,n} - k_{off}r_{tr,b}, \quad (21a)$$

$$\frac{dc_{ef,b}}{dt} = k_{on}c_{ef,n}r_{tr,n} - k_{off}c_{ef,b}. \quad (21b)$$

918 Solving for steady state, noting that  $r_{tr,b} = c_{ef,b}$  and defining  $K_D = k_{off}/k_{on}$  we obtain the probability for a  
919 ribosome to be bound as

$$P_b = \frac{r_{tr} - r_{tr,n}}{r_{tr}} = 1 - \frac{(r_{tr} - K_D - c_{ef}) + \sqrt{4K_D r_{tr} + (r_{tr} - K_D - c_{ef})^2}}{2r_{tr}}. \quad (22)$$

920 The binding constant of EF-G to the ribosome complex I (pre-translocation analog with N-Ac-dipeptidyl-  
921 tRNA at the A-site and deacylated-tRNA in the P-site) [Yu *et al.*, 2009] is  $K_D = 0.27 \pm 0.02 \mu\text{M}$ ; we  
922 used this value in our calculations. In the case of WT regulation there are  $\sim 0.83$  EF-G molecules  
923 per ribosome and the expression of the factor is coupled to the ribosome number (*i.e.*, their ratio is  
924 constant) [Dai *et al.*, 2016].

925 **Factor-dependent initiation attempt rate** Successful initiation events are not limited to a single  $L$ -  
926 codon long slot on a mRNA (that can be free or occupied) but can occur on any transcript; and only  
927 the factor-bound ribosomes can attempt an initiation event. Thus, the initiation rate can be described by  
928 Michaelis-Menten kinetics:

$$\zeta = \zeta_0[\text{IF}] \frac{r_i}{K_m + r_i}. \quad (23)$$

929 We can estimate  $K_m$  from kinetic rates determined by Milon *et al.* [Milon *et al.*, 2012] where the free 30S  
930 subunit is bound (almost simultaneously) by IF1 and IF2 with rate  $(2-10) \times 10^2 \mu\text{M}^{-1}\text{s}^{-1}$  and dissociates  
931 at rate  $30 \text{ s}^{-1}$ . From these values, we estimate  $K_m \approx 0.05 \mu\text{M}$ .

932 **Estimation of model parameters** It is useful to estimate if WT translation is in the initiation or translo-  
933 cation limited regime, which we can obtain from the average ribosome density. We can estimate the  
934 ribosome density as  $\rho_r = 3\beta_r N_r / (r_m t_m)$ , where  $N_r$ ,  $\beta_r$ ,  $r_m$  and  $t_m$  are the number of ribosomes, the  
935 fraction of active ribosomes, the rate of mRNA synthesis per cell, and the average mRNA life-time, re-  
936 spectively [Bremer and Dennis, 1996]. The fraction of translating ribosomes  $\beta_r$  is estimated from fitting  
937 a Hill function to data from Ref. [Dai *et al.*, 2016] (Fig. S6). For higher growth rates, the relation be-  
938 tween growth rate and (calculated) ribosome density linearizes; extrapolating to  $\lambda_0 = 2.0 \text{ h}^{-1}$ , we obtain  
939  $\rho_r \approx 0.042$  (Fig. S6), which yields  $\Xi \approx 3.7 \mu\text{M}$ . For cells grown in LB, the average number of transcripts  
940 per cell was measured as  $N_{\text{mRNA}} \approx 7800$  [Bartholomäus *et al.*, 2016]. To estimate the mRNA concen-  
941 tration, we use  $\Xi = N_{\text{mRNA}}/V_{\text{cell}} = (N_{\text{mRNA}}/m_{\text{dry}}) \times (m_{\text{dry}}/m_{\text{wet}}) \times (m_{\text{wet}}/V_{\text{cell}})$ , where  $m_{\text{dry}}/m_{\text{wet}} \approx 1/3.1$   
942 and  $m_{\text{wet}}/V_{\text{cell}} \approx 1.09 \text{ g/mL}$  are growth-rate independent quantities (see SI of Ref. [Greulich *et al.*,  
943 2015]). We obtained the dry mass of the cell at  $\lambda = 2.0 \text{ h}^{-1}$  by extrapolating from measured data  
944 at various growth rates [Bremer and Dennis, 1996] as  $m_{\text{dry}} \approx 1.01 \text{ pg/cells}$  (Fig. S6) which in turn  
945 yields  $\Xi \approx 4.5 \mu\text{M}$ . This value differs from the estimate above by  $\approx 22\%$ .

946 The estimated ribosome density is  $\rho_r \approx 0.042$ , which is lower than the maximal attainable ribosome  
947 density of  $\rho_{r,\max} = \rho_{\max}/L = 1/(L + \sqrt{L})|_{L=16} = 0.05$ . Thus, translation in the WT is likely in the initiation-  
948 limited regime. Thus, the equations for ribosomal density and elongation velocity for the initiation limiting  
949 regime are used to estimate the apparent initiation and translocation attempt rates:

$$\rho_r(\zeta) = \frac{\zeta}{\gamma + \zeta(L-1)} \approx 0.042 \quad \text{and} \quad u = (\gamma - \zeta)s \approx 18 \text{ aa/s.} \quad (24)$$

950 The apparent rates are  $\gamma \approx 20.3 \text{ s}^{-1}$  and  $\zeta \approx 2.3 \text{ s}^{-1}$ . This allows us to estimate  $\gamma_0 = \gamma/P_b$ , where  
951 we note that  $c_{\text{ef,WT}} \approx 43.0 \text{ } \mu\text{M}$  (estimated from  $0.83 \times 51.9 \text{ } \mu\text{M}$  where the ribosome concentration is  
952 calculated from the growth law). Next, we estimate the number of translating ribosomes from Eq. (18)  
953 as  $32.6 \text{ } \mu\text{M}$ , which yields  $P_b \approx 0.98$  and finally  $\gamma_0 \approx 20.7 \text{ s}^{-1}$ . We further note that there are 0.3  
954 IF2 molecules per ribosome [Bremer and Dennis, 1996], implying  $[\text{IF}]_{\text{WT}} \approx 15.6 \text{ } \mu\text{M}$ , from which we  
955 estimate  $\zeta_0 \approx \zeta/[\text{IF}]_{\text{WT}} \approx 0.15 \text{ } \mu\text{M}^{-1}\text{s}^{-1}$ .

956 With these parameter values, our model is fully defined and the growth rate is calculated (Mathe-  
957 matica function `NSolve`) as its output based on the concentration of translation factors. To verify the  
958 impact of unperturbed ribosome density  $\rho_r$  (one that supports maximal growth rate at saturating factor  
959 concentrations), we systematically calculated the response surfaces for different values of  $\rho_r$  between  
960 0.001 and 0.049 (Fig. S6). With decreasing unperturbed  $\rho_r$ , the concentration of mRNA  $\Xi$  increases  
961 according to Eq. (20). When  $\Xi \gg \Delta r L / \rho_{\max} \bar{D}$ , the traffic jams of ribosome are not possible anymore  
962 as there are too many mRNAs that can carry more ribosomes than available. The critical unperturbed  
963 ribosome density is  $\rho_{r,\text{crit}} = \lambda_0 / (\kappa_t \Delta r) \times \rho_{r,\max}$  (Fig. S6).

#### 964 **Effect of mRNA growth-rate dependence**

965 The concentration of mRNA could in principle be growth rate-dependent. However, direct dependence  
966 of mRNA as a function of the growth rate is difficult to estimate from existing literature as total RNA  
967 is mostly composed of rRNA and tRNA [Dai *et al.*, 2016; Scott *et al.*, 2010]; estimation of the mRNA  
968 fraction is thus prone to errors. However, if we assume proportionality between ribosome and mRNA  
969 concentration, a simplified form can be written down as  $\Xi = \Xi_0 r_{\text{tot}} / r_{\text{tot},0}$ , where  $\Xi_0$  and  $r_{\text{tot},0} = r_{\text{min}} + \lambda_0 / \kappa_t$   
970 are the estimates of mRNA concentration from the previous section and total ribosome concentration  
971 in the unperturbed case, respectively. Plugging this dependence into the model does not qualitatively  
972 change the suppressive interaction between inhibition of initiation and translocation (Fig. S6). In this  
973 scenario, the increasing number of mRNA transcripts partially alleviates the densification of ribosomes  
974 on transcripts. However, the over-all increasing number of translating ribosomes sequesters the elon-  
975 gation factors – this effect is still alleviated by lowering the initiation rate and in turn the density of  
976 ribosomes.

#### 977 **Rescue mechanisms and inefficiency of direct response to translocation inhibition**

978 Bacteria have evolved rescue mechanisms for stalled ribosomes (tmRNA, ArfA and ArfB). However,  
979 these mechanisms are mostly aimed at the rescue of ribosomes that were stalled due to limiting supply

980 of building blocks or those in non-stop complexes. Former is an unlikely scenario during translocation  
981 limitation: as the building blocks are under-consumed, non-stop complexes can form via the forma-  
982 tion of damaged or truncated mRNA (*e.g.*, via cleavage by RNases) or via collision-induced frame-  
983 shifts [Simms *et al.*, 2019; Keiler, 2015]. However, the tmRNA pathway requires an empty A-site on  
984 the ribosome, which is occupied in the pre-translocation complex, thus hindering the rescue initiation.  
985 Likewise, the ArfA pathway is hindered by an occupied A-site – it requires release factor 2 to bind to the  
986 A-site of the ribosome to initiate premature release and recycling. ArfB on the other hand, can recover  
987 the lack of tmRNA and ArfA pathways only when heavily overexpressed [Chadani *et al.*, 2011] and is  
988 considered ineffective in the WT regime. In sum, established rescue mechanisms are unlikely to recover  
989 stuck ribosomes and we therefore omit these mechanisms from the analysis.

990 Additionally, the cell could have an initiation-inhibiting mechanism in place as a response to translo-  
991 cation inhibition. However, the observed responses of bacteria to translation inhibition show global  
992 derepression of the translation machinery by reducing the levels of ppGpp. Besides the upregulation of  
993 all translation components mentioned in the main text [Maaløe, 1979; Gordon, 1970; Blumenthal *et al.*,  
994 1976; Furano and Wittel, 1975], an additional effect of lower levels of ppGpp is a direct increase of ini-  
995 tiation. The catalytic function of the initiation factor is lowered when ppGpp levels are high, and higher  
996 when ppGpp is reduced [Milon *et al.*, 2006]. These arguments show that an alleviating response of  
997 translocation inhibition by either rescue mechanisms or by direct down-regulation of initiation is unlikely.

## 998 8 Supplementary Information

**Table S1: Chemicals used in this study.** Table contains chemical names and purpose categories, catalog codes and vendor information.

**Table S2: Oligonucleotides used in this study.** Spreadsheet contains primer names, sequences, templates and brief description of use. Spreadsheet is divided into tabs, each corresponding to the aim of a specific cloning step.

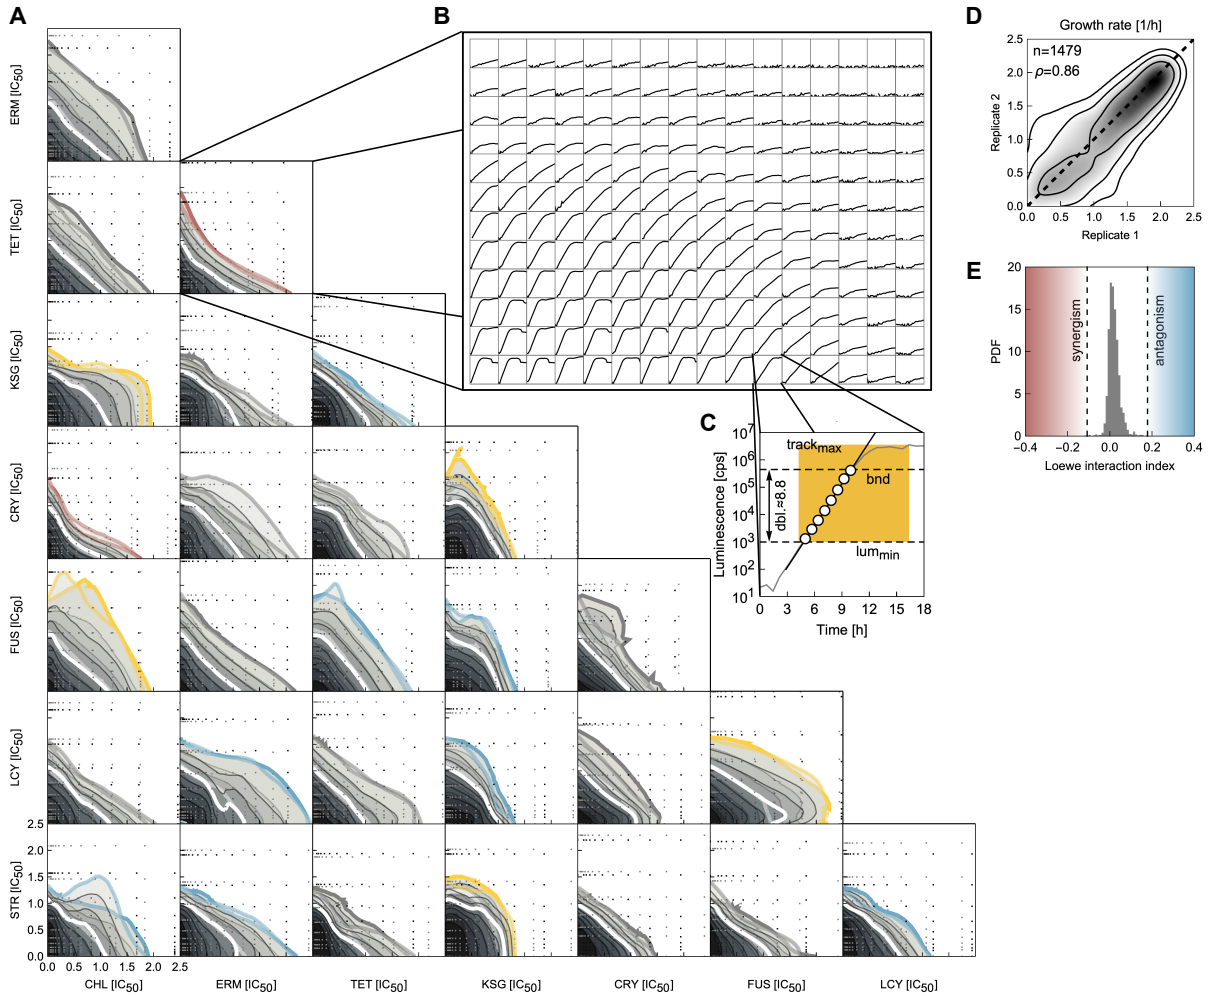

**Figure S1: All dose-response surfaces and examples of growth curves. (A)** Duplicates of dose-response surfaces for all 28 antibiotic pairs. Due to small, but systematic variability in concentrations between replicates done on different days, we rescaled concentration axes with respect to the  $\text{IC}_{50}$ . Dose-response surfaces were smoothed using LOESS (Methods). Black and gray dots denote measured points from different experiments. Isoboles from duplicates are in high agreement; small deviations are caused by occasional outliers that skew the isoboles. As the dose-response surface was measured over a  $12 \times 16$  grid, the duplicates change the drug axes ( $12 \times 16 \rightarrow 16 \times 12$ ) on different days to check for effects coming from spreading the measurements over different plates. **(B)** An example of growth curves over a  $12 \times 16$  grid. Note, that here the concentrations change between wells in a geometric manner, *i.e.* the ratio between concentrations in neighboring wells is fixed. **(C)** Exemplary growth curve and details of the fitting procedure. The growth rate is determined by fitting a line in the regime of exponential growth. The determination of this regime in the growth curve is carried out automatically; procedure: (i) check if the maximum value of luminescence is above the lower bound of the fitting interval  $\text{lum}_{\text{min}} = 10^3$  cps and take points before the maximum, (ii) take points that are the latest to rise over  $\text{lum}_{\text{min}}$ , (iii) determine the upper limit (bnd) of the fitting interval to be either ten-fold above the  $\text{lum}_{\text{min}}$  (guaranteeing  $\log_2 10 \approx 3.3$  doublings of fitting interval) or eight-times less than the track maximum (three doublings away from saturation) and (iv) fit a line to the log-transformed values of the luminescence signal if there are at least three data points. If  $\text{lum}_{\text{min}}$  is not exceeded, the well is counted as having no growth; if any of the other criteria is not fulfilled, growth is characterized as undetermined. **(D)** Reproducibility of absolute growth rate measurements between replicates. The smooth kernel representation of replicate measurements (Mathematica function `SmoothKernelDistribution`), performed on different days and different plate arrangements, demonstrates a good agreement overall. Only non-zero growth rates of sufficient quality ( $R^2 > 0.5$  and relative error  $< 0.5$ ) are included. **(E)** Distribution of Loewe interaction indices of noisy additive surfaces for pairs of drugs with different steepnesses, as obtained by bootstrapping. Note, that this reveals a slight bias towards antagonism.

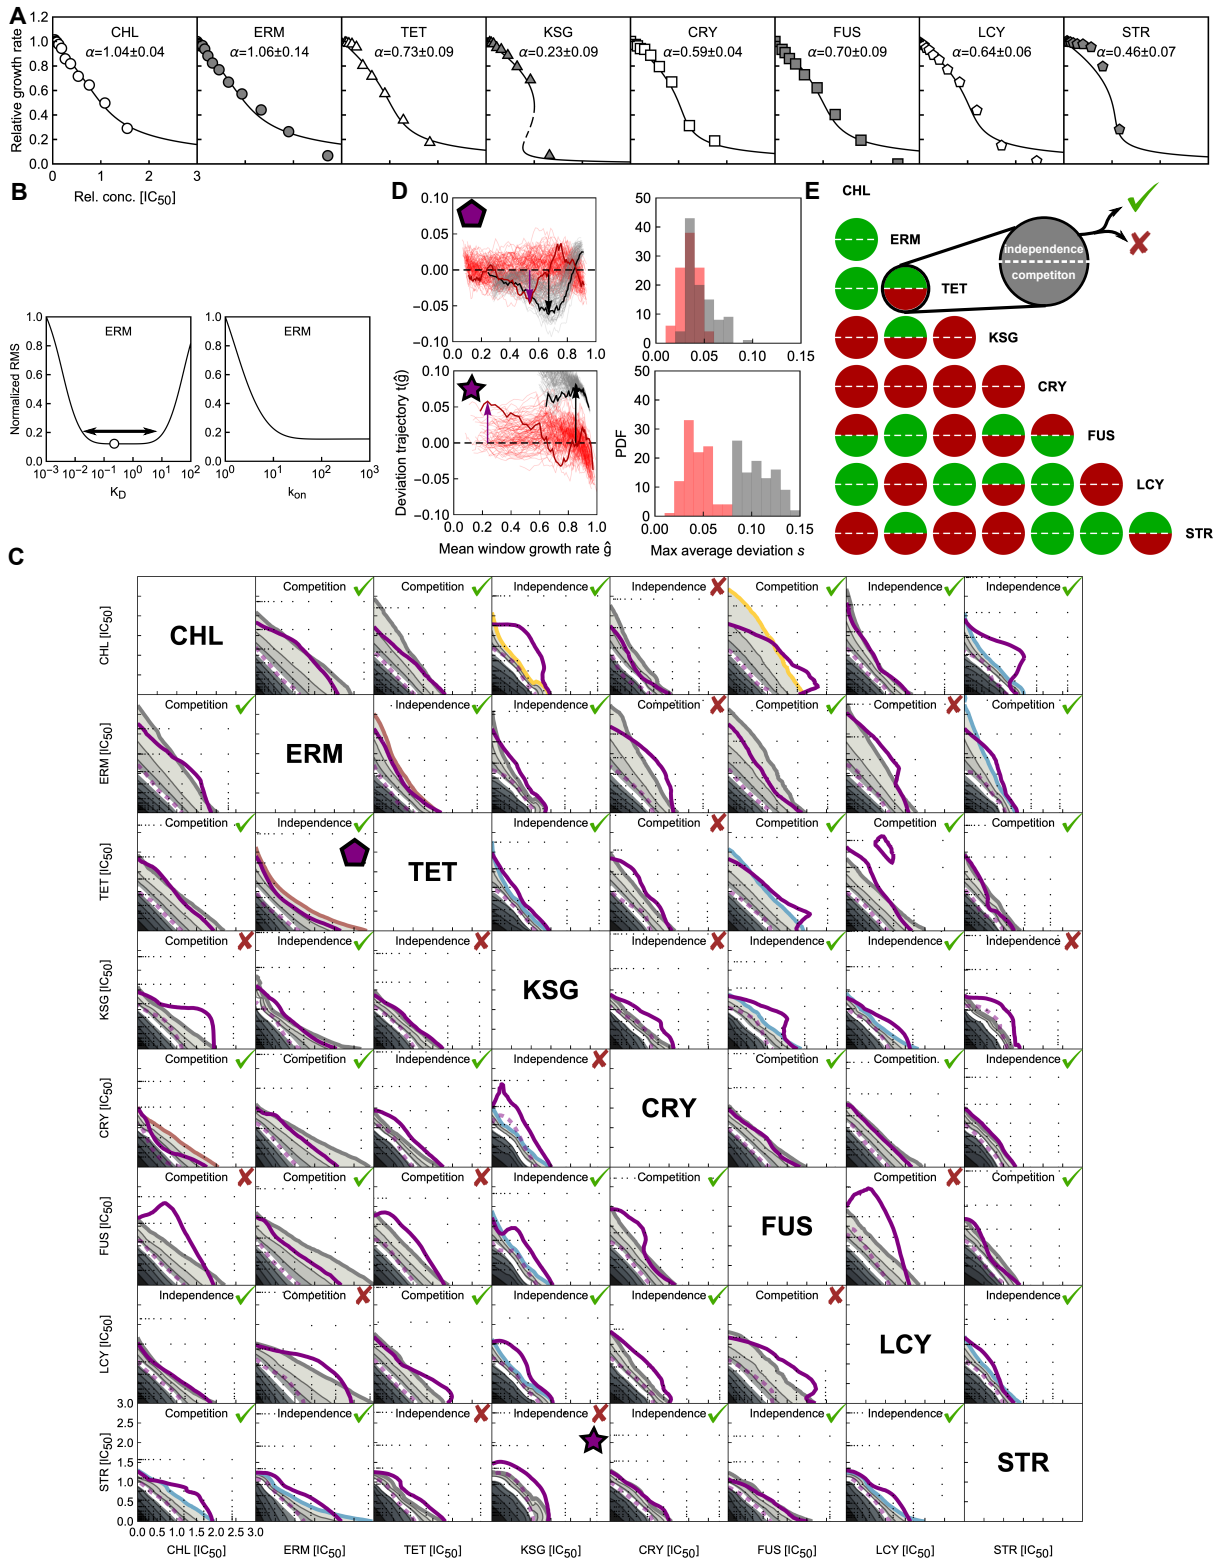

**Figure S2: Details of the biophysical model for pairwise antibiotic combinations** See caption on the next page.

**Figure S2: Details of the biophysical model for pairwise antibiotic combinations** **(A)** Average dose-response curves with best fit model for individual antibiotics. Inset denote the corresponding antibiotic and best-fit steepness parameter  $\alpha$  with standard error. Dose-response curves are predominantly shallow for our selection of antibiotics, *i.e.*,  $\alpha > \alpha_{\text{crit}}$ . Dashed segment of KSG dose-response curve represents an unstable solution. **(B)** Example of an effect of numerical parameters ( $K_D$  and  $k_{\text{on}}$ ) on root-mean-square error (with respect to the experimental data). Parameters are required for forward time integration. Root-mean-square error was normalized with respect to the maximal error in the scanned interval. Effective dissociation constant  $K_D$  exhibits roughly two orders of magnitude wide plateau (double-headed arrow; minimum is denoted by a circle). First order binding rate constant  $k_{\text{on}}$  does not exhibit a plateau but rather flattens out – consistently with the requirement that  $k_{\text{on}} \gg \kappa_t$ . **(C)** All predictions for replicated measurements. Predicted surface is show in full; overlaid thick and dashed purple isobole denote 20% and 50% isobole, respectively, of the measured surface. Each prediction is evaluated for goodness of prediction as described in Methods. Check-mark and cross denote a match and mismatch, respectively. Inset text denotes the best-matching binding scheme. **(D)** Illustration of isobole sliding method. Left: two examples of deviation trajectories  $t(\hat{g})$  for ERM-TET (pentagram) and KSG-STR (five-point star). Thin gray and red lines present hundred bootstrapped repetitions of measured and benchmark trajectories. Two trajectories (thick black and red lines for measured and benchmark, respectively) are highlighted. Black and purple arrows denote maximal deviation of the trajectory from zero for measured and benchmark trajectory. Length of the arrow is max average deviation  $s$ . Right: all  $s$  values from bootstrapped repetitions are collected in the histogram. Pair of ERM-TET offers a better match with benchmark distribution compared to KSG-STR. **(E)** Performance of all schemes against the measurements. Upper and bottom half of each circle denote independence or competition, respectively, as denoted. Green and red color denote match and mismatch, respectively.



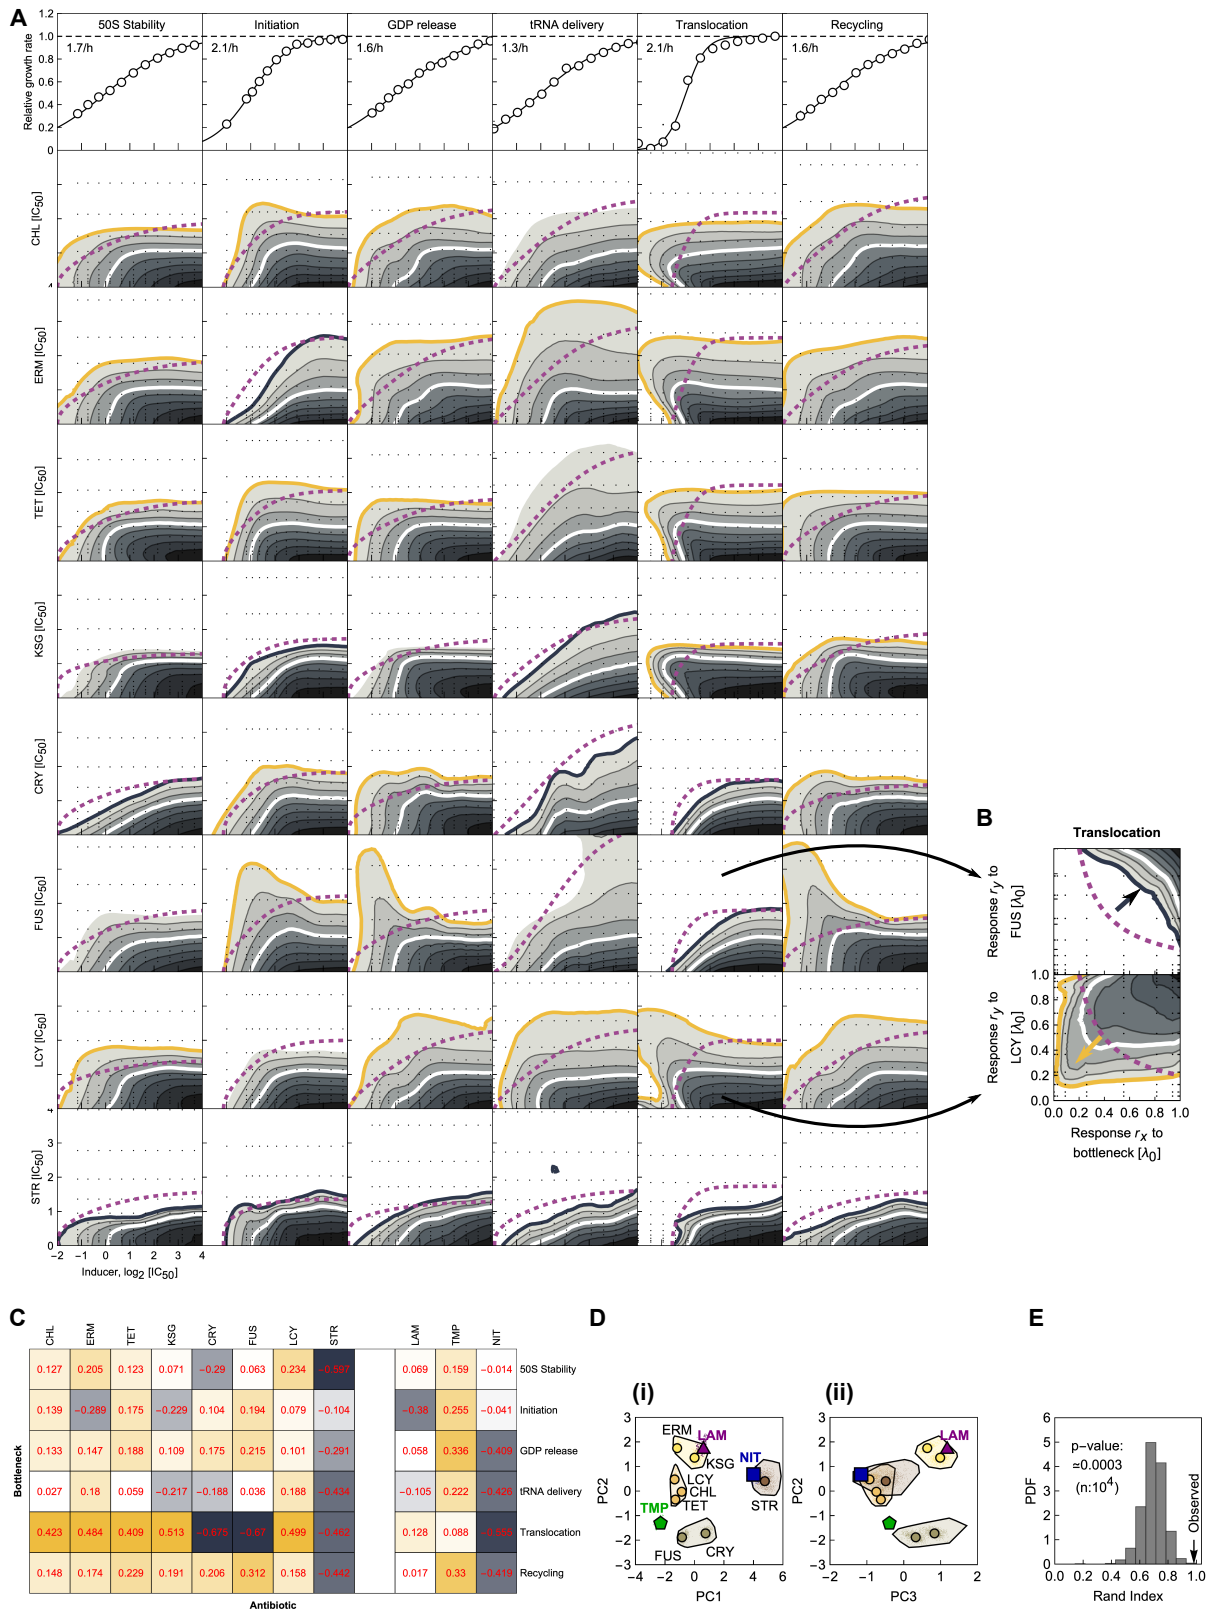

**Figure S3: Bottleneck-antibiotic dose-response surfaces and functional classification.** See caption on the next page.

**Figure S3: Bottleneck-antibiotic dose-response surfaces and functional classification.** (A) Dose-response surfaces for all bottleneck-antibiotic pairs. Surfaces were smoothed using LOESS (Methods). Note the different characters of deviations from independence. (B) Examples of response surfaces over response-response grid. In the response space  $(r_x, r_y)$ , independence is defined as  $r_x r_y$ . Logarithm of the ratio of volumes underneath the measured and independent surface yields a deviation index. For every antibiotic, six bottleneck dependencies together yield a bottleneck dependency vector. (C) Values of bottleneck dependencies for all bottleneck-antibiotic pairs. (D) Projection of bottleneck dependencies on PCA vectors. (i) As in Fig. 3E. (ii) Projection on PCA vectors PC2 and 3. Note the separation of clusters in both projections. (E) Bootstrapped clustering of randomized vectors yields a series of clustering results. With these clustering results at hand, we calculate the Rand index  $RI(w, w')$ . From the distribution of  $RI(w, w')$ , we estimate the empirical cumulative distribution function and corresponding p-value [Eq. (11)] for the clustering result in Fig. 3E.

A

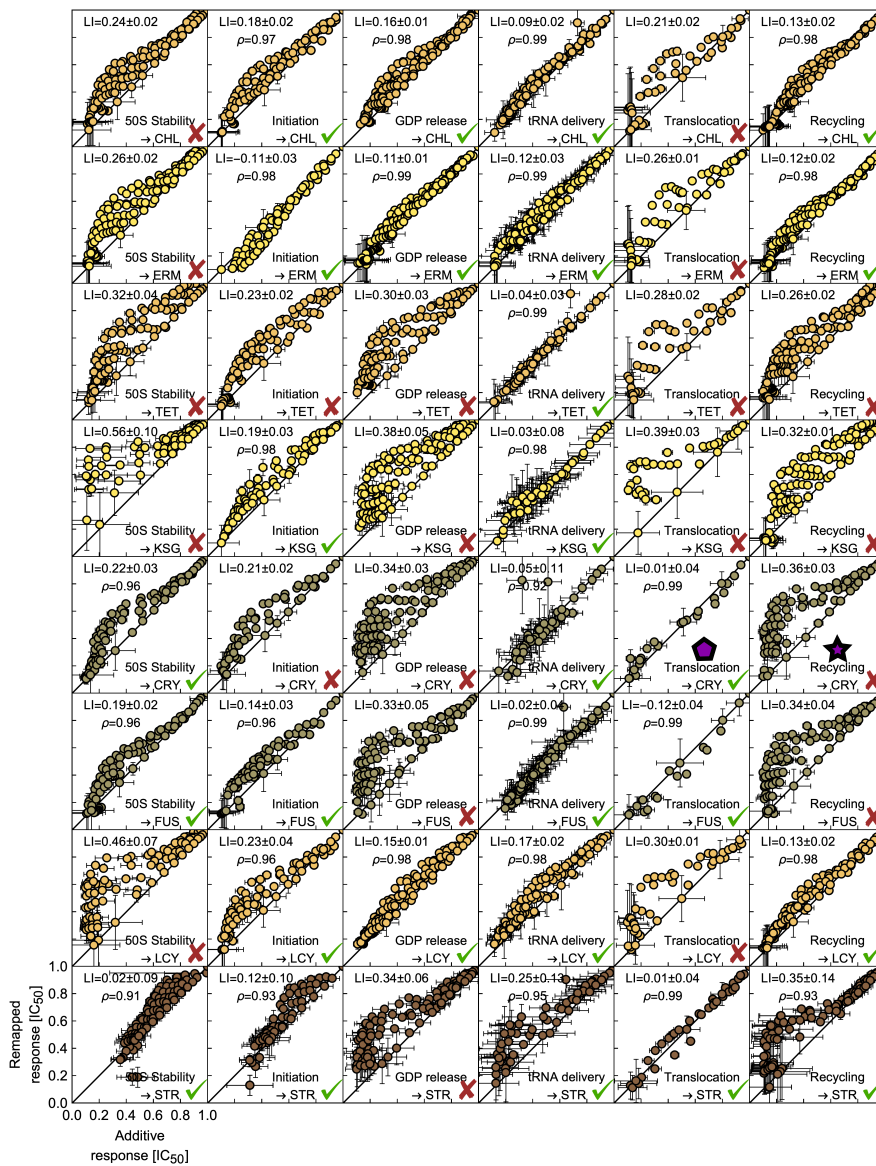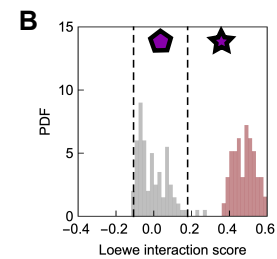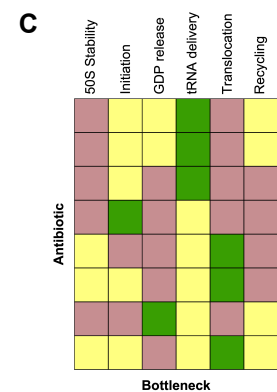

**Figure S4: Remapping-based assessment of primary mode of action.** (A) Scatter plots of growth rates expected for additivity and obtained by self-remapping (Methods).  $LI$  was statistically compared to the boundaries of the additive interval. Green check marks denote that  $LI$  did not fall outside of the additivity interval; in these cases, the rounded correlation  $\rho$  is reported. A good agreement with the additive expectation suggests equivalency of antibiotic and genetic perturbation. (B) Examples of histograms of  $LI$  for CRY in combination with a translocation and recycling bottleneck [see matching pentagon and star in (A)], respectively. (C) Color-coded sequential evaluation of equivalence between bottleneck and translation inhibitor. Red and yellow denote that  $LI$  was outside or inside of the additive interval, respectively. From the cases in which the  $LI$  is statistically inside the additive interval, the case with highest correlation was chosen as the putative primary mode of action (green). This approach correctly identified the mode of action for all cases in which it is known from literature (CRY, FUS, STR, KSG and TET).

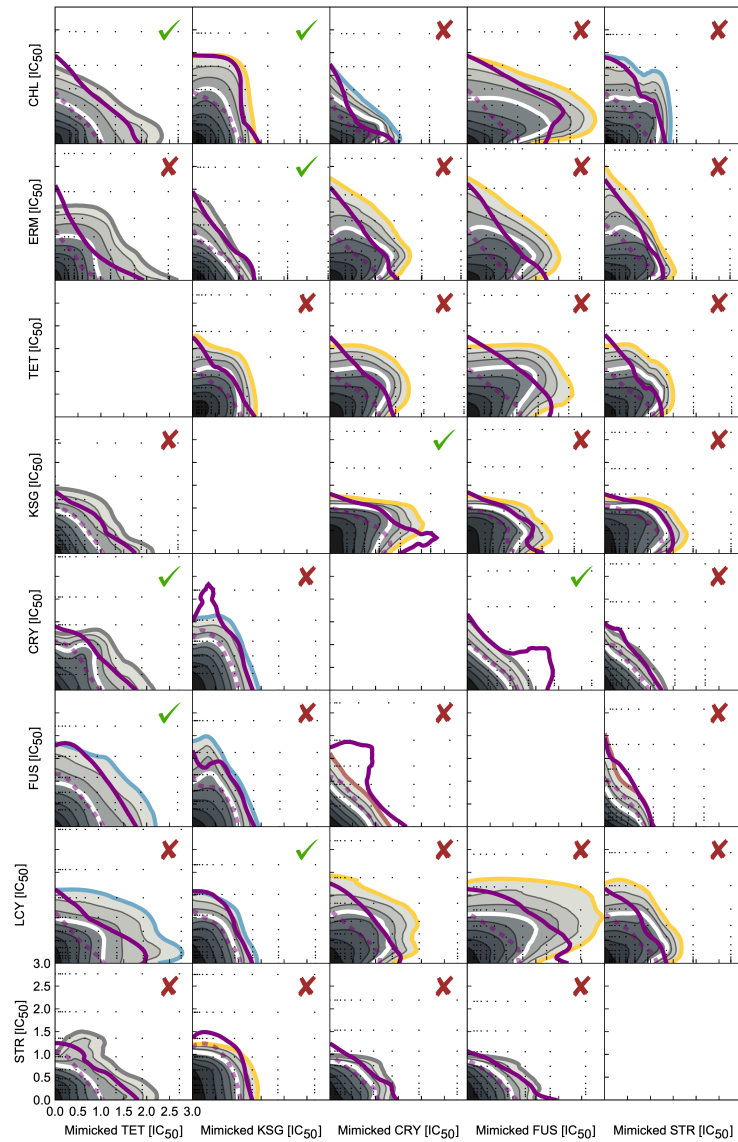

**Figure S5: All possible predictions from perturbations of equivalent effects.** Predicted surface obtained by remapping is show in full; overlaid thick and dashed purple isobole denote 20% and 50% isobole, respectively, of the measured surface. Each prediction is evaluated for goodness of prediction as described in Methods. Check-mark and cross denote a match and mismatch, respectively.

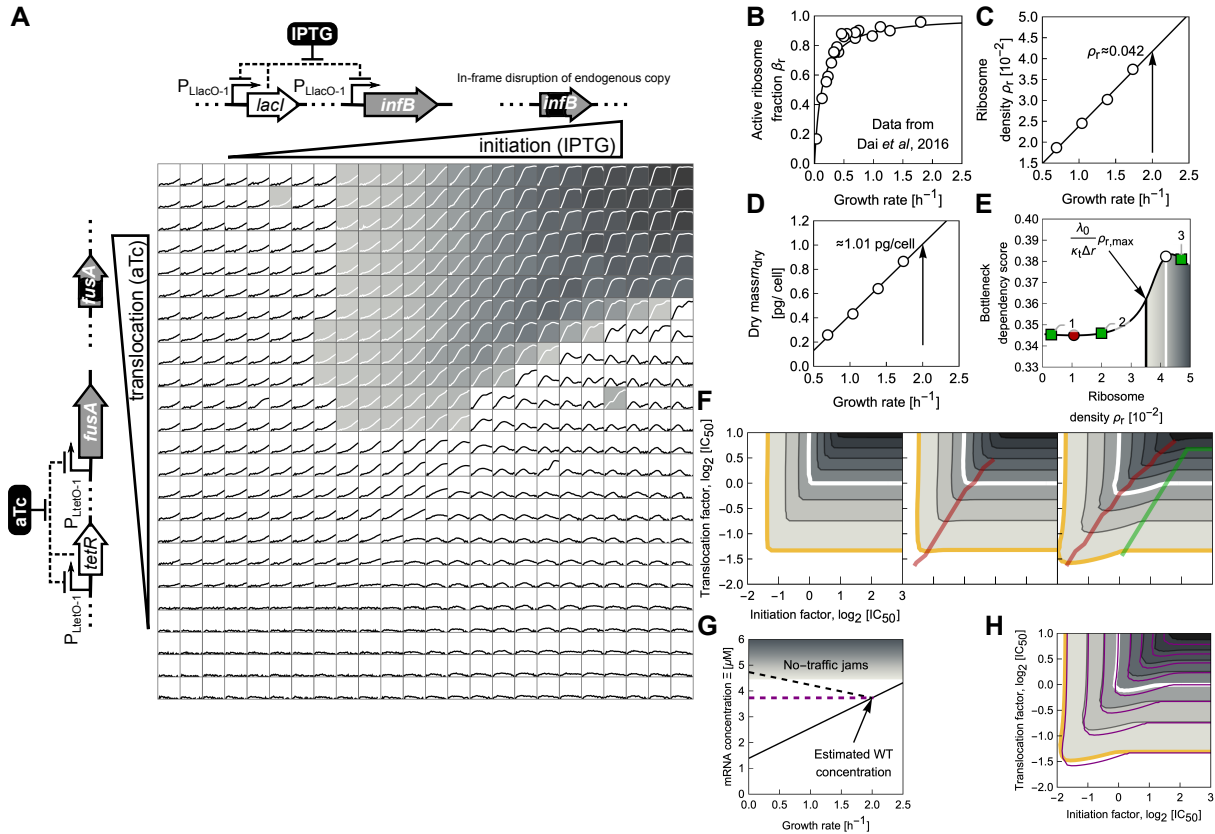

**Figure S6: Double titration platform and model analysis.** (A) Schematics represent the genetic elements of double titration control: negatively auto-repressed transcription factors *lacI* and *tetR* that control the expression of initiation factor *infB* and elongation factor *fusA*, respectively; expression is dependent on the shown inducers (IPTG and aTc). The grid shows the growth curves for the response surface in Fig. 6. Different shades of gray show the growth rate. Only fits of good quality and with growth rates above 0.199 are included. (B) Active ribosome fraction as a function of growth rate in different nutrient environments. Data is from Ref. [Dai et al., 2016]. The solid line represents a best-fit Hill function ( $x/a/[1 + (x/a)]$ ), where  $a \approx 0.12$  h<sup>-1</sup>. (C) Calculated ribosome density  $\rho_r = 3\beta_r N_r / (r_m t_m)$ . The arrow denotes the density for  $\lambda_0 = 2.0$  h<sup>-1</sup>. Solid line shows best fit. (D) Dry mass measurements from Ref. [Bremer and Dennis, 1996] and best-fit linear function (solid line). Arrow denotes the density for  $\lambda_0 = 2.0$  h<sup>-1</sup>. (E) Impact of varying the initial  $\rho_r$  on resulting bottleneck dependency score. Numbered green squares correspond to the examples showcased in (F). The white circle shows the result for the estimated value of WT  $\rho_r \approx 0.042$ . The red circle shows the point ( $\rho_r \approx 0.0106$ ) where first derivative becomes positive and the BD score starts increasing. The solid vertical line shows the critical value  $\lambda_0 \rho_{r,max} / (\kappa_t \Delta r)$  above which traffic jams due to translocation limitation can form. (F) Response surfaces for  $\rho_r$  values shown in (E). For  $\rho_r \ll 0.01$  the ridge line (red; defined by the concentration of initiation factor that supports the highest growth rate at a given concentration of translocation factor) is not well defined, and tends towards high concentrations of initiation factor. For  $\rho_r > 0.1$ , the ridge line moves towards the "corner" of the response surface. After the value  $\lambda_0 \rho_{r,max} / (\kappa_t \Delta r)$  is surpassed, traffic jams develop when the translocation rate is sufficiently low. (G) Two models of mRNA concentration dependence. Black lines denote the dependence of mRNA on growth rate if the co-regulation between total RNA and mRNA (Methods) is assumed; solid and dashed lines correspond to variation of the nutrient quality and translation perturbation, respectively. The arrow denotes the estimated mRNA concentration for cells grown in LB (Methods); this concentration is assumed constant (dashed purple line) in the model shown in the main text. If the mRNA concentration exceeds  $\Delta r / (\rho_{max,r} \bar{D})$ , traffic jams do not develop. Elongation factors are still sequestered as the number of translating ribosomes increases, which in turn decreases the growth rate. (H) Direct comparison of model predictions. Prediction with growth-dependent mRNA concentration  $\Xi$  is depicted in full gray-scale tones; isoboles from the prediction assuming a constant pool of mRNA are shown in purple. Both results are qualitatively equivalent.
